# Supplementary material for: Unexpected CN bond formation via NaI-catalyzed oxidative de-tetra-hydrogenative cross-couplings between N,N-dimethyl aniline and sulfamides
Source: Royal Society of Chemistry journal article supplement (doi:10.1039/c5ra06773a), 2015-01-01

## SUPPORTING INFORMATION

# Unexpected C=N bond formation *via* NaI-catalyzed oxidative de-tetra-hydrogenative cross-couplings between *N*, *N*-dimethyl aniline and sulfamides

Yang Zheng,<sup>a</sup> Jincheng Mao,<sup>\*a,b</sup> Jie Chen,<sup>a</sup> Guangwei Rong,<sup>a</sup> Defu Liu,<sup>a</sup> Hong  
Yan,<sup>a</sup> Yongjian Chi<sup>a</sup> and Xinfang Xu<sup>\*a</sup>

<sup>a</sup>Key Laboratory of Organic Synthesis of Jiangsu Province, College of Chemistry, Chemical Engineering  
and Materials Science, Soochow University, Suzhou 215123, P. R. <sup>China</sup>.

<sup>b</sup>State Key Laboratory of Oil and Gas Reservoir Geology and Exploitation, Southwest Petroleum  
University, Chengdu, 610500, P. R. China

Fax: (+86)512-6588-0403

E-mail: jcmao@suda.edu.cn

### Table of Contents

|                                                                    |         |
|--------------------------------------------------------------------|---------|
| 1. General information                                             | S2      |
| 2. Characterization of the corresponding products                  | S3-S10  |
| 3. Mechanism Study of the Ligand                                   | S10-S12 |
| 4. Intermediates C Identification                                  | S13-S14 |
| 5. HRMS Observation of the Product from <i>N,N</i> -Diethylaniline | S15     |
| 6. Reference                                                       | S15     |
| 7. NMR Spectra                                                     | S16-S39 |

**General experimental:** All reactions were carried out in air. Solvents were dried and degassed by the standard methods. Benzene sulfonamide, *N,N*-dimethyl aniline and the additives used in this reaction were obtained from commercial sources and used without further purification. *N,N*-disubstituted aniline derivatives were prepared according to the reference.<sup>1</sup> Flash column chromatography was performed using silica gel (300–400 mesh). Analytical thin-layer chromatography was performed using glass plates pre-coated with 200–300 mesh silica gel impregnated with a fluorescent indicator (254 nm). NMR spectra were recorded in CDCl<sub>3</sub> on a Varian Inova-400 NMR spectrometer (300 or 400 MHz) with TMS as an internal reference. Products were characterized by comparison of <sup>1</sup>H NMR, <sup>13</sup>C NMR and TOF-MS data in the literatures.

**General procedure for the preparation of benzene-substituted sulfonamide.**<sup>2</sup> To a Schlenk tube equipped with a magnetic stir bar was added benzene-substituted sulfonyl chloride (1.46 mmol) and ammonium hydroxide (4.0 mL) in air. The reaction mixture was kept stirring at 0 °C for 3-4 hours. At the end of the reaction, the aqueous layer was extracted with ether and washed with water and brine, the organic layer was dried with anhydrous Na<sub>2</sub>SO<sub>4</sub>, and the solvent was removed under reduced pressure. The residue was purified by silica gel column chromatography gel (eluent: Hexanes/EtOAc = 90:10 to 80:20) to afford the pure product sulfonamide **1** in 80%~90% yield.

**General procedure for the NaI-catalyzed oxidative de-tetra-hydrogenative cross-coupling reactions.** To a Schlenk tube equipped with a magnetic stir bar was added sulfonamide **1** (0.5 mmol), **2** aniline (2.1 mmol), NaI (sodiumiodide, 0.01 mmol, 15.0 mg), TBHP (*tert*-butyl hydroperoxide, 5-6 M in decane, 1.5 mmol, 0.27 mL), 1,10-phenanthroline monohydrate (0.05 mmol, 9.0 mg) and ethyl acetate (2.0 mL). The reaction mixture was kept stirring at 80 °C for 12 hours. At the end of the reaction, the reaction mixture was cooled to room temperature. After removal of the solvent, the residue was purified to column chromatography on silica gel (eluent: Hexanes/EtOAc = 90:10 to 80:20) to give the pure product **3**.

**(E)-N-Methyl-N-phenyl-N'-(phenylsulfonyl)formimidamide**

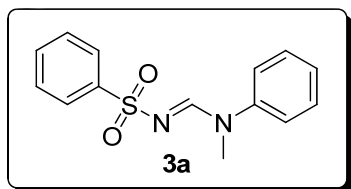

Yellow solid; mp: 102-103 °C;  $^1\text{H}$  NMR (400 MHz,  $\text{CDCl}_3$ ) ( $\delta$ , ppm) 8.57 (s, 1H), 7.96-7.93 (m, 2H), 7.54-7.52 (m, 1H), 7.51-7.47 (m, 2H), 7.45-7.41 (m, 2H), 7.34-7.30 (m, 1H), 7.21-7.19 (m, 2H), 3.44 (s, 3H);  $^{13}\text{C}$  NMR (100 MHz,  $\text{CDCl}_3$ ) ( $\delta$ , ppm) 158.6, 143.2, 141.8, 132.2, 129.9, 128.9, 127.5, 126.7, 122.1, 36.1; HRMS (TOF MS  $\text{Cl}^+$ )  $[\text{M}+\text{H}]^+$  calculated for  $\text{C}_{14}\text{H}_{15}\text{N}_2\text{O}_2\text{S}$  275.0854, found 275.0859.

**(E)-N-Methyl-N'-(phenylsulfonyl)-N-p-tolylformimidamide**

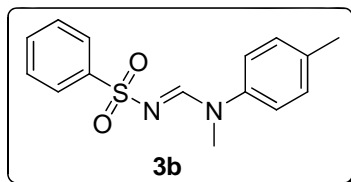

Yellow solid; mp: 105-106 °C;  $^1\text{H}$  NMR (400 MHz,  $\text{CDCl}_3$ ) ( $\delta$ , ppm) 8.55 (s, 1H), 7.97-7.95 (m, 2H), 7.56-7.54 (m, 1H), 7.53-7.49 (m, 2H), 7.24 (d,  $J = 4.0$  Hz, 2H), 7.10 (d,  $J = 8.8$  Hz, 2H), 3.44 (s, 3H), 2.39 (s, 3H);  $^{13}\text{C}$  NMR (100 MHz,  $\text{CDCl}_3$ ) ( $\delta$ , ppm) 158.5, 141.9, 140.8, 137.5, 132.1, 130.4, 128.8, 126.7, 122.1, 36.3, 20.9; HRMS (TOF MS  $\text{Cl}^+$ )  $[\text{M}+\text{H}]^+$  calculated for  $\text{C}_{15}\text{H}_{17}\text{N}_2\text{O}_2\text{S}$  289.1011, found 289.1018.

**(E)-N-(4-Fluorophenyl)-N-methyl-N'-(phenylsulfonyl)formimidamide**

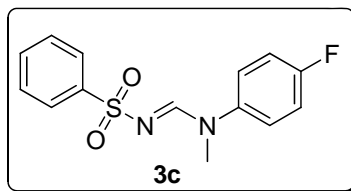

Yellow solid; mp: 120-121 °C;  $^1\text{H}$  NMR (400 MHz,  $\text{CDCl}_3$ ) ( $\delta$ , ppm) 8.51(s, 1H), 7.95 (d,  $J = 6.8$  Hz, 2H), 7.59-7.55 (m, 1H), 7.53-7.49(m, 2H), 7.22-7.19 (m, 2H), 7.16-7.12 (m, 2H), 3.44(s, 3H);  $^{13}\text{C}$  NMR (100 MHz,  $\text{CDCl}_3$ ) ( $\delta$ , ppm) 161.5 (d,  $J = 250.0$  Hz), 158.5, 141.6, 139.4, 132.3, 128.9, 126.7, 124.4 (d,  $J = 8.6$  Hz), 116.8 (d,  $J = 22.9$  Hz), 36.6; HRMS (TOF MS  $\text{Cl}^+$ )  $[\text{M}+\text{H}]^+$  calculated for  $\text{C}_{14}\text{H}_{14}\text{FN}_2\text{O}_2\text{S}$  293.0760, found 293.0771.

**(E)-N-(3-Bromophenyl)-N-methyl-N'-(phenylsulfonyl)formimidamide**

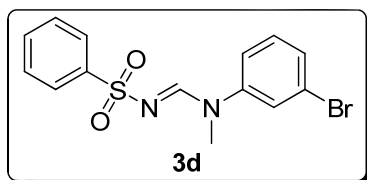

Yellow solid; mp: 128-130°C; <sup>1</sup>H NMR (400 MHz, CDCl<sub>3</sub>) (δ, ppm) 8.58 (s, 1H), 7.96-7.94 (m, 2H), 7.57-7.55 (m, 1H), 7.53-7.49 (m, 2H), 7.47-7.45 (m, 1H), 7.38 (t, *J* = 6.0 Hz, 1H), 7.32-7.28 (m, 1H), 7.18-7.15 (m, 1H), 3.44(s, 3H); <sup>13</sup>C NMR (100 MHz, CDCl<sub>3</sub>) (δ, ppm) 158.3, 144.3, 141.4, 132.4, 131.2, 130.4, 128.9, 126.8, 125.1, 123.4, 120.6, 36.0; HRMS (TOF MS Cl<sup>+</sup>) [M+H]<sup>+</sup> calculated for C<sub>14</sub>H<sub>14</sub>BrN<sub>2</sub>O<sub>2</sub>S 352.9959, found 352.9968.

**(E)-N-(4-Bromophenyl)-N-methyl-N'-(phenylsulfonyl)formimidamide**

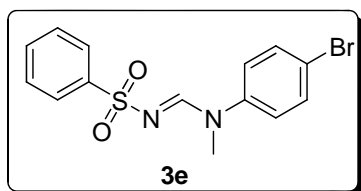

Yellow solid; mp: 128-129 °C; <sup>1</sup>H NMR (400 MHz, CDCl<sub>3</sub>) (δ, ppm) 8.55 (s, 1H), 7.93 (d, *J* = 7.2 Hz, 2H), 7.55-7.47 (m, 5H), 7.09 (d, *J* = 8.4 Hz, 2H), 3.42 (s, 3H); <sup>13</sup>C NMR (100 MHz, CDCl<sub>3</sub>) (δ, ppm) 158.2, 142.2, 141.5, 133.0, 132.4, 128.9, 126.7, 123.6, 120.8, 36.0; HRMS (TOF MS Cl<sup>+</sup>) [M+H]<sup>+</sup> calculated for C<sub>14</sub>H<sub>14</sub>BrN<sub>2</sub>O<sub>2</sub>S 352.9959, found 352.9962.

**(E)-N-(3-Chlorophenyl)-N-methyl-N'-(phenylsulfonyl)formimidamide**

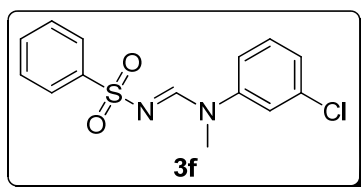

Yellow solid; mp: 124-125 °C; <sup>1</sup>H NMR (400 MHz, CDCl<sub>3</sub>) (δ, ppm) 8.58 (s, 1H), 7.94 (d, *J* = 7.2 Hz, 2H), 7.56-7.48 (m, 3H), 7.39-7.35 (m, 1H), 7.31-7.28 (m, 1H), 7.22(t, *J* = 2.0 Hz, 1H), 7.13-7.10 (m, 1H), 3.43(s, 3H); <sup>13</sup>C NMR (100 MHz, CDCl<sub>3</sub>) (δ, ppm) 158.3, 144.2, 141.4, 135.5, 132.4, 131.0, 128.9, 127.5, 126.7, 122.2, 120.1, 36.0; HRMS (TOF MS Cl<sup>+</sup>) [M+H]<sup>+</sup> calculated for C<sub>14</sub>H<sub>14</sub>ClN<sub>2</sub>O<sub>2</sub>S 309.0465, found 309.0466.

**(E)-N-(2-Chlorophenyl)-N-methyl-N'-(phenylsulfonyl)formimidamide**

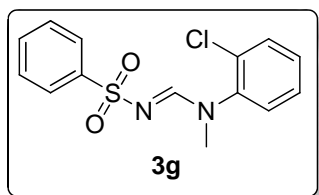

Yellow oil;  $^1\text{H}$  NMR (400 MHz,  $\text{CDCl}_3$ ) ( $\delta$ , ppm) 8.32 (s, 1H), 7.97-7.95 (m, 2H), 7.58-7.50 (m, 4H), 7.40-7.38 (m, 2H), 7.31-7.28 (m, 1H), 3.28 (s, 3H);  $^{13}\text{C}$  NMR (100 MHz,  $\text{CDCl}_3$ ) ( $\delta$ , ppm) 160.1, 141.7, 140.5, 132.2, 131.4, 131.0, 130.2, 128.8, 128.3, 126.8, 37.1; HRMS (TOF MS  $\text{Cl}^+$ )  $[\text{M}+\text{H}]^+$  calculated for  $\text{C}_{14}\text{H}_{14}\text{ClN}_2\text{O}_2\text{S}$  309.0465, found 309.0466.

**(E)-N-(4-Chlorophenyl)-N-methyl-N'-(phenylsulfonyl)formimidamide**

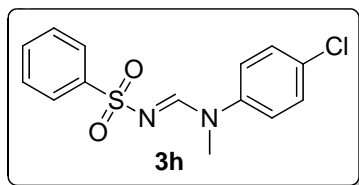

Yellow solid; mp: 110-111  $^\circ\text{C}$ ;  $^1\text{H}$  NMR (400 MHz,  $\text{CDCl}_3$ ) ( $\delta$ , ppm) 8.56 (s, 1H), 7.96-7.94 (m, 2H), 7.57-7.49 (m, 3H), 7.43-7.40 (m, 2H), 7.18-7.15 (m, 2H);  $^{13}\text{C}$  NMR (100 MHz,  $\text{CDCl}_3$ ) ( $\delta$ , ppm) 158.3, 141.7, 141.5, 133.1, 132.3, 130.0, 128.9, 126.7, 123.3, 36.1; HRMS (TOF MS  $\text{Cl}^+$ )  $[\text{M}+\text{H}]^+$  calculated for  $\text{C}_{14}\text{H}_{14}\text{ClN}_2\text{O}_2\text{S}$  309.0465, found 309.0467.

**(E)-N-Methyl-N-(4-nitrophenyl)-N'-(phenylsulfonyl)formimidamide**

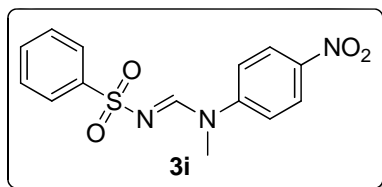

Yellow solid; mp: 128-130  $^\circ\text{C}$ ;  $^1\text{H}$  NMR (400 MHz,  $\text{CDCl}_3$ ) ( $\delta$ , ppm) 8.70 (s, 1H), 8.20-8.17 (m, 1H), 8.10 (t,  $J = 2.0$  Hz, 1H), 7.96-7.94 (m, 2H), 7.69-7.65 (m, 1H), 7.62-7.57 (m, 2H), 7.54-7.51 (m, 2H), 3.53 (s, 3H);  $^{13}\text{C}$  NMR (100 MHz,  $\text{CDCl}_3$ ) ( $\delta$ , ppm) 158.2, 149.0, 144.1, 141.0, 132.6, 131.0, 129.0, 127.3, 126.8, 121.8, 116.6, 35.9; HRMS (TOF MS  $\text{Cl}^+$ )  $[\text{M}+\text{H}]^+$  calculated for  $\text{C}_{14}\text{H}_{14}\text{N}_3\text{O}_4\text{S}$  320.0705, found 320.0709.

**(E)-N-Methyl-N-phenyl-N'-tosylformimidamide**

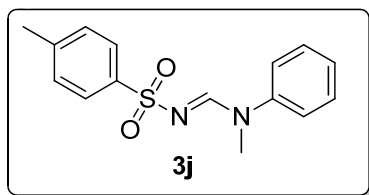

Yellow solid; mp: 108-110 °C; <sup>1</sup>H NMR (400 MHz, CDCl<sub>3</sub>) (δ, ppm) 8.58 (s, 1H), 7.84 (d, *J* = 8.0 Hz, 2H), 7.46-7.42 (m, 2H), 7.35-7.28 (m, 3H), 7.22-7.20 (m, 2H), 3.45(s, 3H), 2.43(s, 3H); <sup>13</sup>C NMR (100 MHz, CDCl<sub>3</sub>) (δ, ppm) 158.4, 143.2, 142.9, 138.9, 129.9, 129.5, 127.3, 126.8, 122.1, 36.1, 21.5; HRMS (TOF MS Cl<sup>+</sup>) [M+H]<sup>+</sup> calculated for C<sub>15</sub>H<sub>17</sub>N<sub>2</sub>O<sub>2</sub>S 289.1011, found 289.1013.

**(E)-N'-(4-Methoxyphenylsulfonyl)-N-methyl-N-phenylformimidamide**

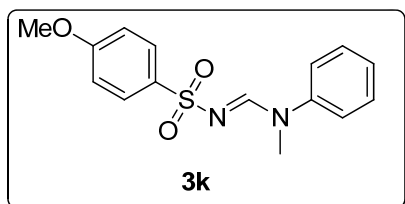

Yellow solid; mp: 101-104 °C; <sup>1</sup>H NMR (400 MHz, CDCl<sub>3</sub>) (δ, ppm) 8.56 (s, 1H), 7.87 (d, *J* = 8.8 Hz, 2H), 7.45-7.44 (m, 2H), 7.33-7.28 (m, 1H), 7.20 (d, *J* = 7.6 Hz, 2H), 6.97 (d, *J* = 8.8 Hz, 2H), 3.85 (s, 3H), 3.44 (s, 3H); <sup>13</sup>C NMR (100 MHz, CDCl<sub>3</sub>) (δ, ppm) 162.6, 158.2, 143.3, 133.6, 129.9, 128.8, 127.3, 122.0, 114.0, 55.6, 36.0; HRMS (TOF MS Cl<sup>+</sup>) [M+H]<sup>+</sup> calculated for C<sub>15</sub>H<sub>17</sub>N<sub>2</sub>O<sub>3</sub>S 305.0960, found 305.0971.

**(E)-N'-(4-Fluorophenylsulfonyl)-N-methyl-N-phenylformimidamide**

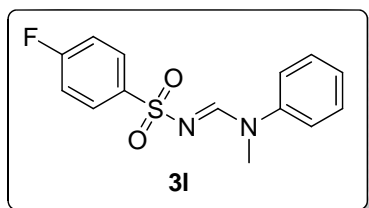

Yellow solid; mp: 125-128 °C; <sup>1</sup>H NMR (400 MHz, CDCl<sub>3</sub>) (δ, ppm) 8.57 (s, 1H), 7.98-7.95 (m, 2H), 7.47-7.43 (m, 2H), 7.37-7.33 (m, 1H), 7.23-7.21 (m, 2H), 7.20-7.15 (m, 2H), 3.47 (s, 3H); <sup>13</sup>C NMR (100 MHz, CDCl<sub>3</sub>) (δ, ppm) 164.9 (d, *J* = 252 Hz), 158.5, 143.1, 137.9, 129.9, 129.5 (d, *J* = 9.2 Hz), 127.5, 122.2, 116.0 (d, *J* = 22.4 Hz), 36.2; HRMS (TOF MS Cl<sup>+</sup>) [M+H]<sup>+</sup> calculated for C<sub>14</sub>H<sub>14</sub>FN<sub>2</sub>O<sub>2</sub>S 293.0760, found 293.0769.

**(E)-N'-(3-Bromophenylsulfonyl)-N-methyl-N-phenylformimidamide**

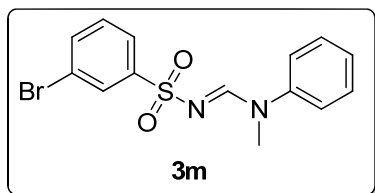

Yellow solid; mp: 99-100 °C; <sup>1</sup>H NMR (400 MHz, CDCl<sub>3</sub>) (δ, ppm) 8.54(s, 1H), 8.07 (t, *J* = 2.0 Hz, 1H), 7.89-7.86 (m, 1H), 7.67-7.64 (m, 1H), 7.46-7.41(m, 2H), 7.37-7.32 (m, 2H), 7.23-7.20 (m, 2H), 3.46 (s, 3H); <sup>13</sup>C NMR (100 MHz, CDCl<sub>3</sub>) (δ, ppm) 158.7, 143.7, 143.0, 135.2, 130.5, 130.0, 129.7, 127.7, 125.3, 122.7, 122.2, 36.3; HRMS (TOF MS Cl<sup>+</sup>) [M+H]<sup>+</sup> calculated for C<sub>14</sub>H<sub>14</sub>BrN<sub>2</sub>O<sub>2</sub>S 352.9959, found 352.9963.

**(E)-N'-(4-Chlorophenylsulfonyl)-N-methyl-N-phenylformimidamide**

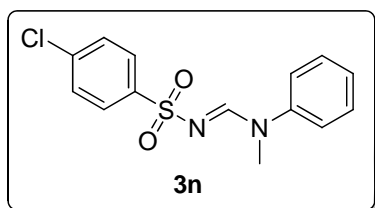

Yellow solid; mp: 96-99 °C; <sup>1</sup>H NMR (400 MHz, CDCl<sub>3</sub>) (δ, ppm) 8.56 (s, 1H), 7.99 (d, *J* = 8.4 Hz, 2H), 7.48-7.43 (m, 4H), 7.36-7.33 (m, 1H), 7.23-7.21 (m, 2H), 3.46 (s, 3H); <sup>13</sup>C NMR (100 MHz, CDCl<sub>3</sub>) (δ, ppm) 158.6, 143.1, 140.4, 138.6, 129.9, 129.1, 128.2, 127.6, 122.2, 36.2; HRMS (TOF MS Cl<sup>+</sup>) [M+H]<sup>+</sup> calculated for C<sub>14</sub>H<sub>14</sub>ClN<sub>2</sub>O<sub>2</sub>S 309.0465, found 309.0466.

**(E)-N'-(4-Bromophenylsulfonyl)-N-methyl-N-phenylformimidamide**

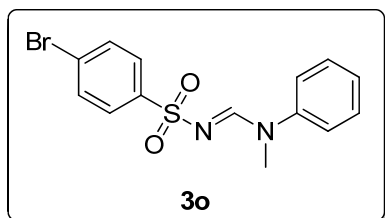

Yellow solid; mp: 105-106 °C; <sup>1</sup>H NMR (400 MHz, CDCl<sub>3</sub>) (δ, ppm) 8.57 (s, 1H), 7.82 (d, *J* = 8.8 Hz, 2H), 7.65 (d, *J* = 8.4 Hz, 2H), 7.48 -7.44 (m, 2H), 7.38-7.34 (m, 1H), 7.24-7.21 (m, 2H), 3.47 (s, 3H); <sup>13</sup>C NMR (100 MHz, CDCl<sub>3</sub>) (δ, ppm) 158.6, 143.1, 140.9, 132.1, 129.9, 128.4, 127.6, 127.1, 122.2, 36.2; HRMS (TOF MS Cl<sup>+</sup>) [M+H]<sup>+</sup> calculated for C<sub>14</sub>H<sub>14</sub>BrN<sub>2</sub>O<sub>2</sub>S 352.9959, found 352.9970.

**(E)-N-(4-(N-((Methyl(phenyl)amino)methylene)sulfamoyl)phenyl)acetamide**

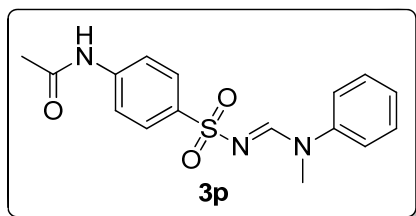

Yellow solid; mp: 200-203 °C; <sup>1</sup>H NMR (400 MHz, DMSO) (δ, ppm) 10.32 (s, 1H), 8.48(s, 1H), 7.82-7.74 (m, 4H), 7.50-7.43 (m, 4H), 7.37-7.34 (m, 1H), 3.38 (s, 3H), 2.09 (s, 3H); <sup>13</sup>C NMR (100 MHz, DMSO) (δ, ppm) 169.4, 158.8, 143.5, 143.1, 136.0, 130.1, 128.0, 127.4, 122.5, 119.0, 36.0, 24.6; HRMS (TOF MS Cl<sup>+</sup>) [M+H]<sup>+</sup> calculated for C<sub>16</sub>H<sub>18</sub>N<sub>3</sub>O<sub>3</sub>S 332.1069, found 332.1078.

**(E)-N-Methyl-N-phenyl-N'-(4-(trifluoromethyl)phenyl)sulfonylformimidamide**

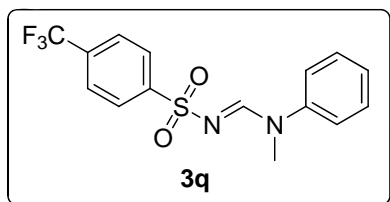

Yellow solid; mp: 102-104 °C; <sup>1</sup>H NMR (400 MHz, CDCl<sub>3</sub>) (δ, ppm) 8.57 (s, 1H), 8.07 (d, *J* = 8.4 Hz, 2H), 7.75 (d, *J* = 8.4 Hz, 2H), 7.47-7.43 (m, 2H), 7.37-7.33 (m, 1H), 7.23-7.21 (m, 2H), 3.46 (s, 3H); <sup>13</sup>C NMR (100 MHz, CDCl<sub>3</sub>) (δ, ppm) 158.9, 145.4, 143.0, 133.8 (d, *J* = 32.7 Hz), 130.0, 127.8, 127.3, 126.0 (q, *J* = 3.7 Hz), 122.3, 36.3; HRMS (TOF MS Cl<sup>+</sup>) [M+H]<sup>+</sup> calculated for C<sub>15</sub>H<sub>14</sub>F<sub>3</sub>N<sub>2</sub>O<sub>2</sub>S 343.0728, found 343.0730.

**(E)-N-Methyl-N'-(4-nitrophenylsulfonyl)-N-phenylformimidamide**

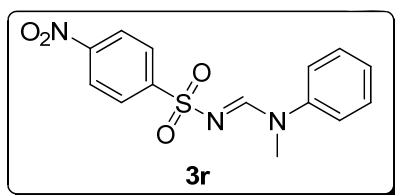

Yellow solid; mp: 148-149 °C; <sup>1</sup>H NMR (400 MHz, CDCl<sub>3</sub>) (δ, ppm) 8.58 (s, 1H), 8.35 (d, *J* = 8.8 Hz, 2H), 8.14 (d, *J* = 9.2 Hz, 2H), 7.49-7.45 (m, 2H), 7.40-7.36 (m, 1H), 7.25-7.23 (m, 2H), 3.49 (s, 3H); <sup>13</sup>C NMR (100 MHz, CDCl<sub>3</sub>) (δ, ppm) 159.0, 149.8, 147.6, 142.9, 130.0, 128.1, 127.9, 124.1, 122.3, 36.5; HRMS (TOF MS Cl<sup>+</sup>) [M+H]<sup>+</sup> calculated for C<sub>14</sub>H<sub>14</sub>N<sub>3</sub>O<sub>4</sub>S 320.0705, found 320.0708.



**(E)-N-Methyl-N'-(naphthalen-2-ylsulfonyl)-N-phenylformimidamide**

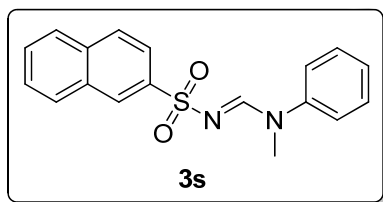

Yellow solid; mp: 132-134 °C; <sup>1</sup>H NMR (400 MHz, CDCl<sub>3</sub>) (δ, ppm) 8.63 (s, 1H), 8.52 (s, 1H), 7.96-7.88 (m, 4H), 7.63-7.56 (m, 2H), 7.45-7.41 (m, 2H), 7.34-7.30 (m, 1H), 7.21-7.19 (m, 2H), 3.45 (s, 1H); <sup>13</sup>C NMR (100 MHz, CDCl<sub>3</sub>) (δ, ppm) 158.6, 143.2, 138.7, 134.7, 132.2, 129.9, 129.3, 129.1, 128.5, 127.9, 127.5, 127.4, 127.3, 122.6, 122.1, 36.2; HRMS (TOF MS Cl<sup>+</sup>) [M+H]<sup>+</sup> calculated for C<sub>18</sub>H<sub>17</sub>N<sub>2</sub>O<sub>2</sub>S 325.1011, found 325.1017.

**(E)-N'-(Mesitylsulfonyl)-N-methyl-N-phenylformimidamide**

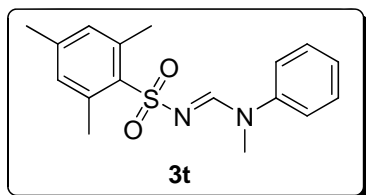

Yellow solid; mp: 151-152 °C; <sup>1</sup>H NMR (400 MHz, CDCl<sub>3</sub>) (δ, ppm) 8.58 (s, 1H), 7.44-7.40 (m, 2H), 7.33-7.29 (m, 1H), 7.19-7.17 (m, 2H), 6.94 (s, 2H), 3.43 (s, 3H), 2.71 (s, 6H), 2.29 (s, 3H); <sup>13</sup>C NMR (100 MHz, CDCl<sub>3</sub>) (δ, ppm) 157.7, 143.4, 141.7, 138.8, 135.8, 131.6, 129.9, 127.2, 122.0, 36.0, 23.0, 20.9; HRMS (TOF MS Cl<sup>+</sup>) [M+H]<sup>+</sup> calculated for C<sub>17</sub>H<sub>21</sub>N<sub>2</sub>O<sub>2</sub>S 317.1324, found 317.1329.

**(E)-N-Methyl-N-phenyl-N'-(thiophen-2-ylsulfonyl)formimidamide**

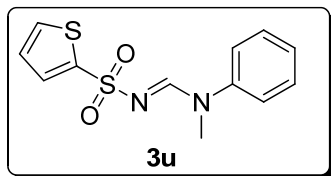

Yellow solid; mp: 105-106 °C; <sup>1</sup>H NMR (400 MHz, CDCl<sub>3</sub>) (δ, ppm) 8.54 (s, 1H), 7.65-7.64 (m, 1H), 7.56-7.55 (m, 1H), 7.46-7.42 (m, 2H), 7.35-7.31 (m, 1H), 7.21-7.19 (m, 2H), 7.07-7.04 (m, 1H), 3.47 (s, 3H); <sup>13</sup>C NMR (100 MHz, CDCl<sub>3</sub>) (δ, ppm) 158.6, 143.1, 143.0, 131.4, 131.2, 129.9, 127.6, 127.2, 122.2, 36.3; HRMS (TOF MS Cl<sup>+</sup>) [M+H]<sup>+</sup> calculated for C<sub>12</sub>H<sub>13</sub>N<sub>2</sub>O<sub>2</sub>S<sub>2</sub> 281.0418, found 281.0426.

## ***N*-((Methyl(phenyl)amino)methyl)benzamide**

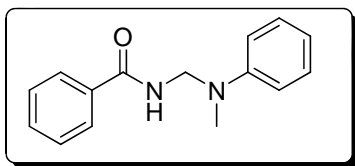

White solid;  $^1\text{H}$  NMR (400 MHz,  $\text{CDCl}_3$ ) ( $\delta$ , ppm) 7.73-7.71 (m, 2H), 7.50-7.46 (m, 1H), 7.41-7.37 (m, 2H), 7.30-7.25 (m, 2H), 6.87-6.80 (m, 3H), 6.64 (s, 1H), 5.11 (d,  $J = 5.6$  Hz, 2H), 3.06 (s, 3H);  $^{13}\text{C}$  NMR (100 MHz,  $\text{CDCl}_3$ ) ( $\delta$ , ppm) 168.0, 147.9, 134.1, 131.7, 129.5, 128.6, 127.0, 118.3, 113.3, 58.2, 38.0.

## **2-(Methyl(phenyl)amino)acetonitrile**

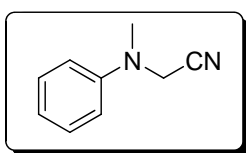

Yellow oil;  $^1\text{H}$  NMR (400 MHz,  $\text{CDCl}_3$ ) ( $\delta$ , ppm) 7.38-7.34 (m, 2H), 6.97 (t,  $J = 7.2$  Hz, 1H), 6.91 (d,  $J = 8.0$  Hz, 2H), 4.19 (s, 1H), 3.03 (s, 1H);  $^{13}\text{C}$  NMR (100 MHz,  $\text{CDCl}_3$ ) ( $\delta$ , ppm) 147.8, 129.5, 120.2, 115.6, 114.9, 42.3, 39.3.

## **Mechanism Study of the Ligand**

We collected the reaction conversion data at 1.5 h, 3.5 h, 5.5 h and 7.5 h for both reactions, and the results are summarized below. With these data, we found that, at various reaction times, the ratio of **3a:C** is almost identical either in the reaction with or without ligand (see the red part in the Table below, and determined from the ratio of integrated absorptions in  $^1\text{H}$  NMR spectra that corresponded to the methyl groups with crude reaction mixture); however, the ratio of **3a: 2a** or **C:2a in the reaction with the ligand is higher than the one without the ligand** (see the blue part in the Table below). Although we are still not sure how exactly the ligand works in our system, according to these observation, we can confirm that the ligand assists the first part of the transformation to form the intermediate **C**

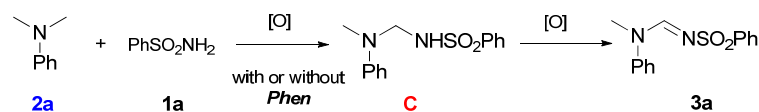

| Time  | With ligand ( <b>3a:C:2a</b> ) | Without ligand ( <b>3a:C:2a</b> ) |
|-------|--------------------------------|-----------------------------------|
| 1.5 h | 1.0:1.4:13.7                   | 1.0:1.4:18.2                      |
| 3.5 h | 1.0:0.7:10.0                   | 1.0:0.6:11.2                      |
| 5.5 h | 1.0:0.4:8.1                    | 1.0:0.4:10.9                      |
| 7.5 h | 1.0:0.2:7.2                    | 1.0:0.1:8.3                       |

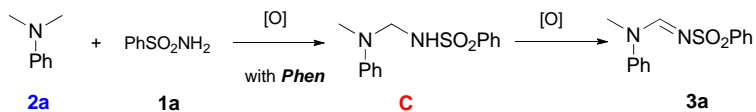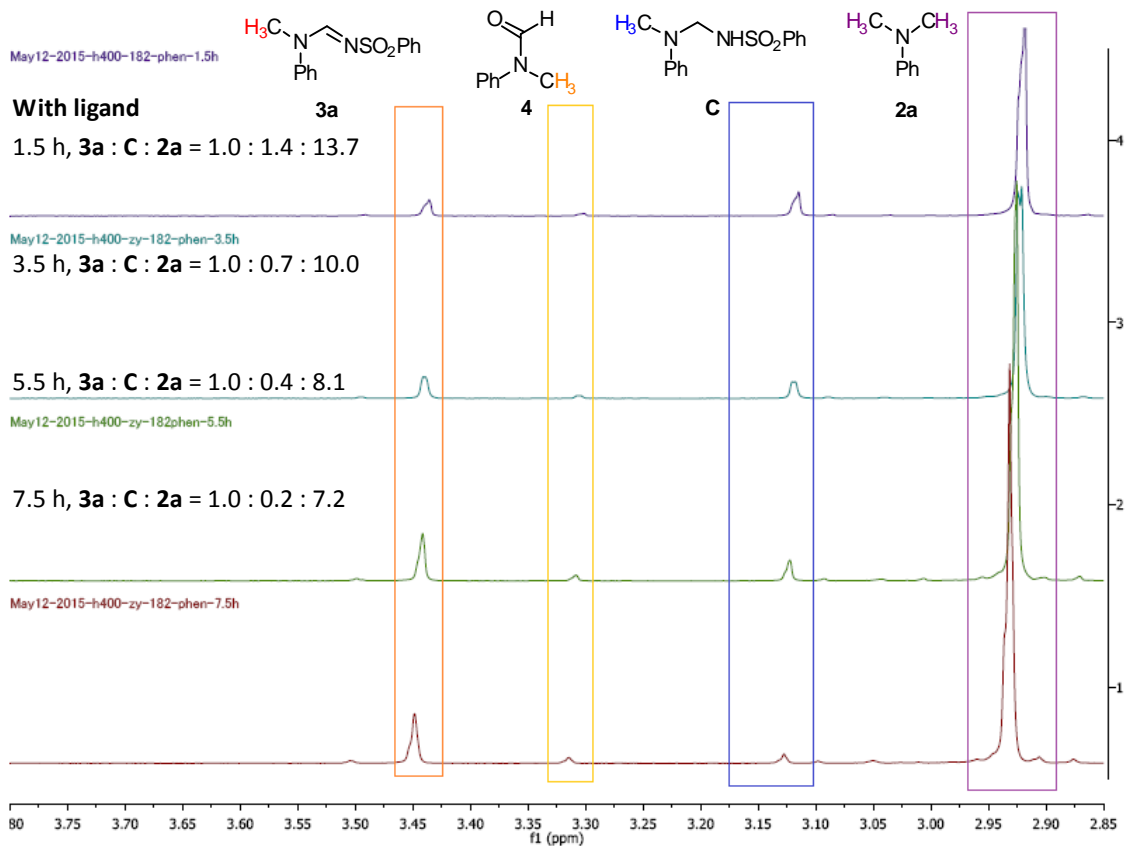

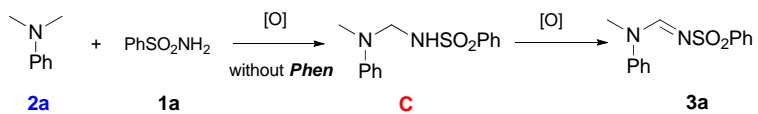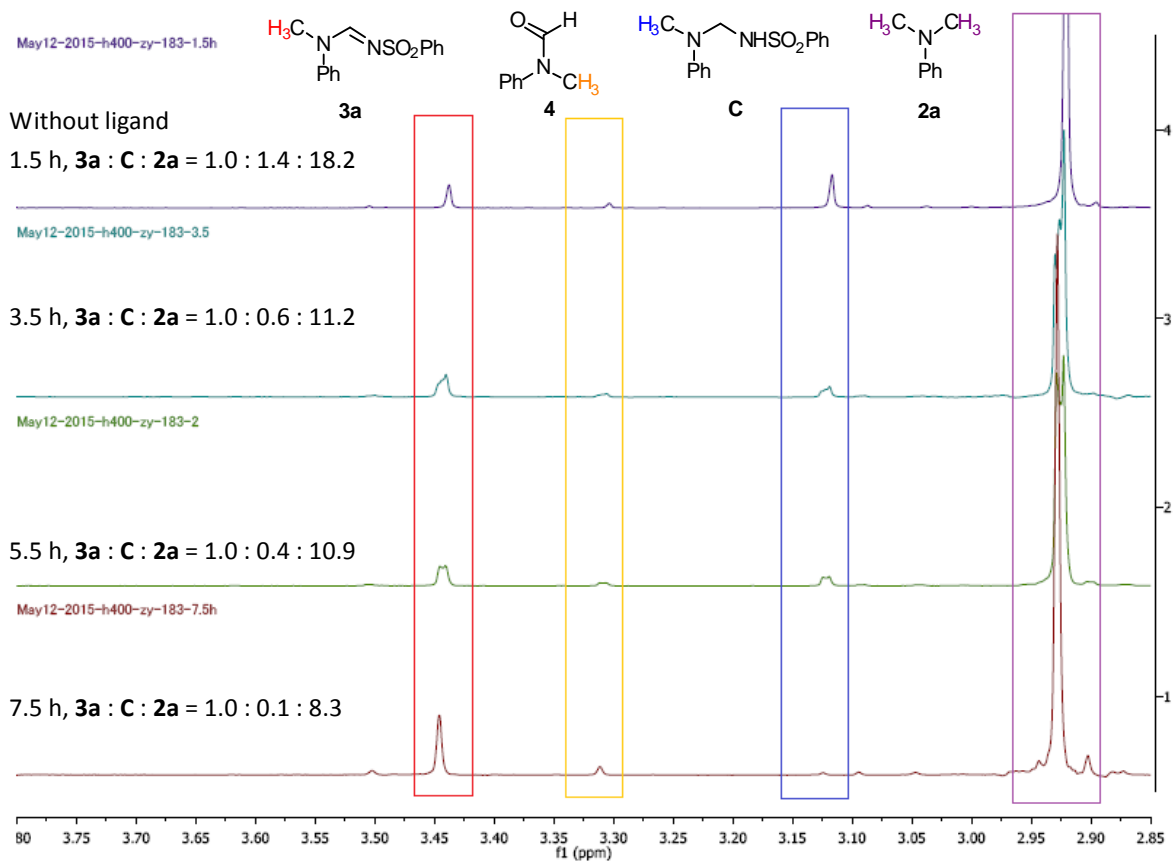

## Intermediates C Identification

### Proton NMR observation:

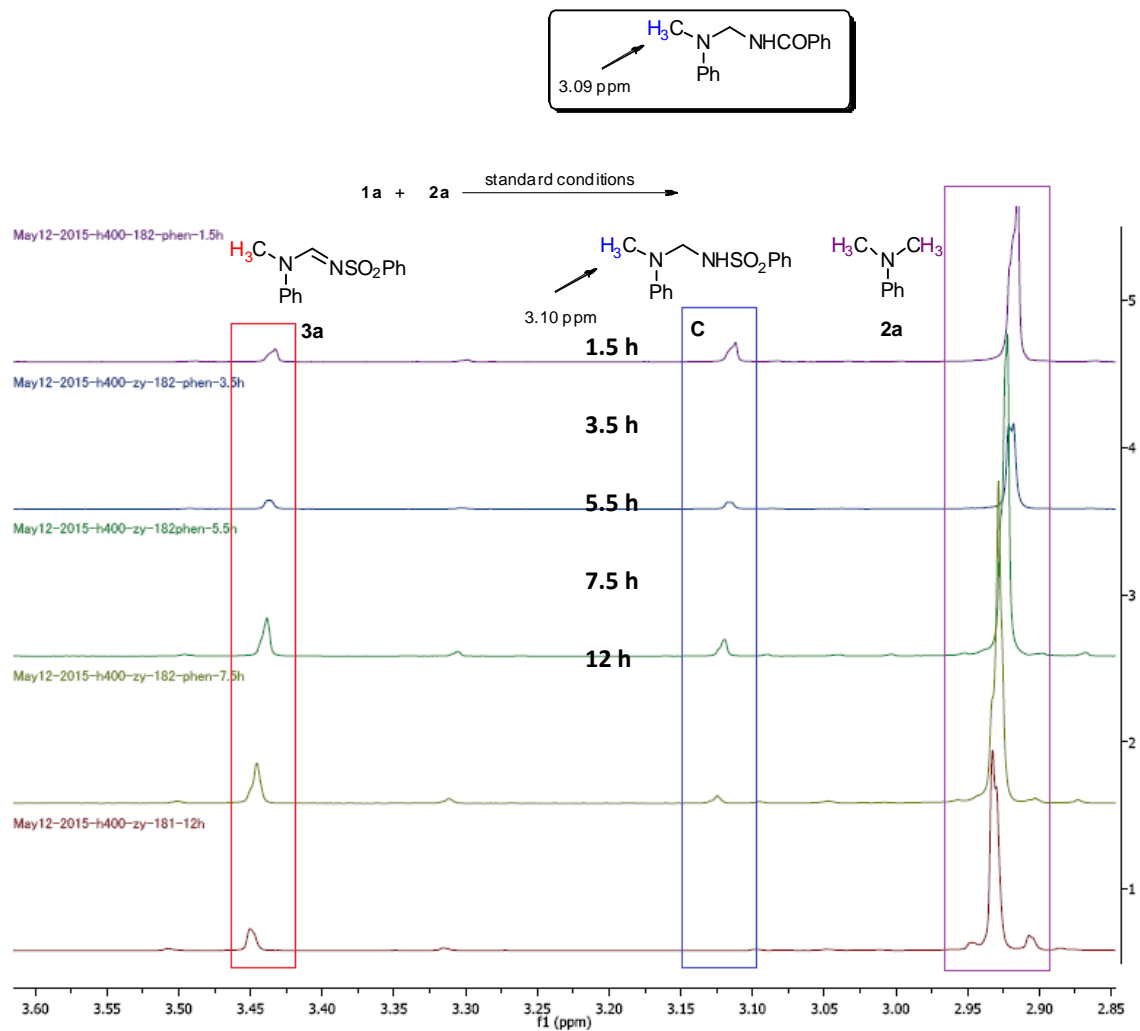

## HRMS report of the observation of the intermediate C:

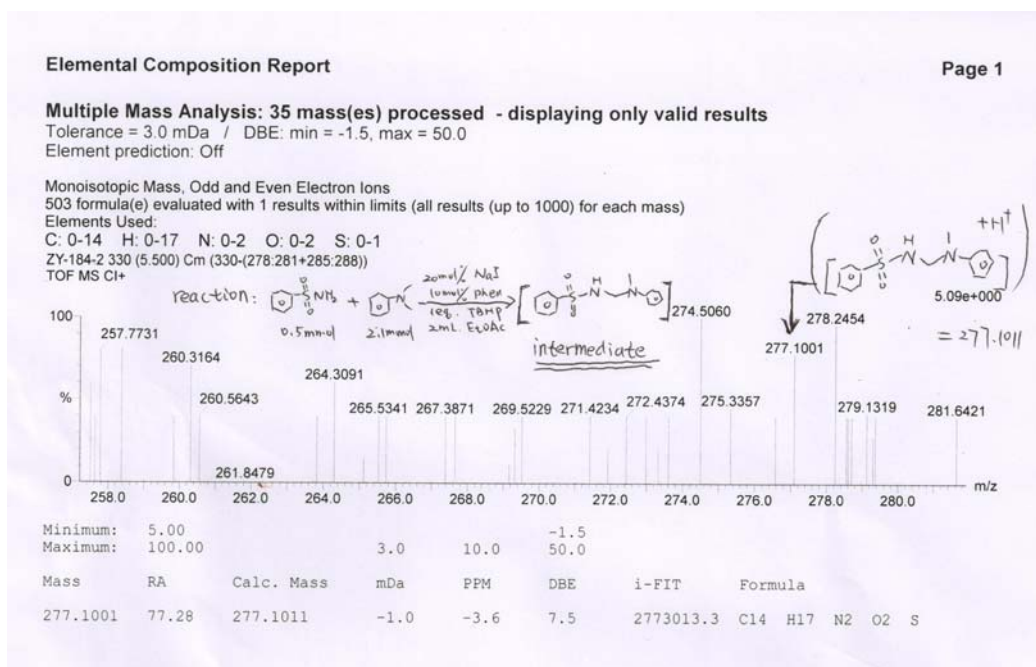

## HRMS Observation of the Product from *N,N*-Diethylaniline

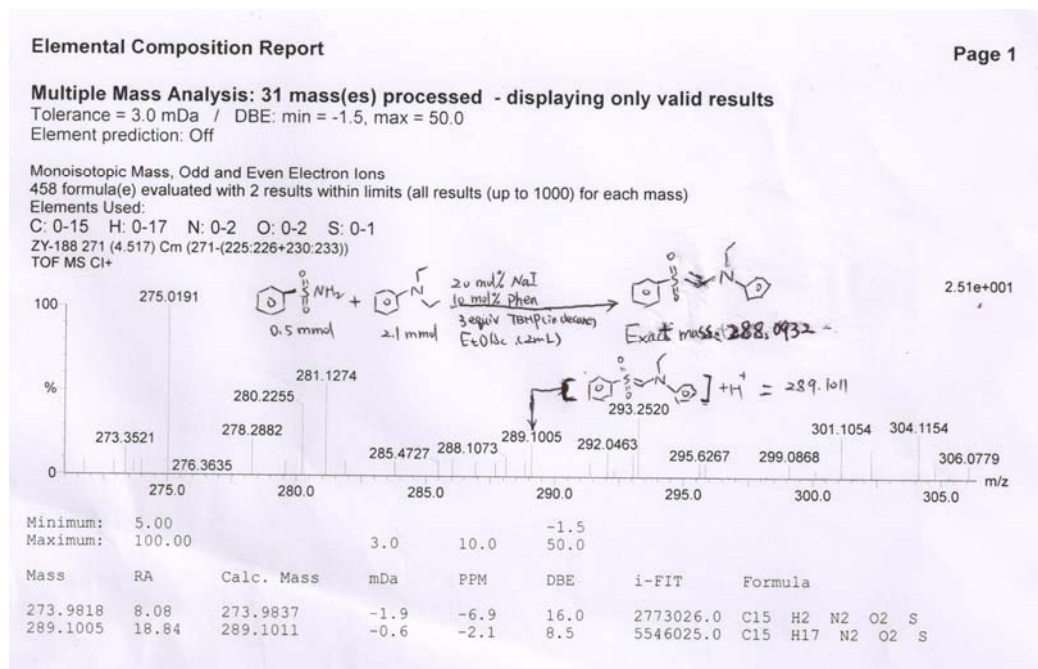

### Reference:

- 1 L. S. Kristen, C. O. Allie and B. F. Matthew, *J. Am. Chem. Soc.*, 2011, **133**, 16970.
- 2 (a) W. J. Kerr, M. Reid and T. Tuttle, *ACS Catal.*, 2015, **5**, 402; (b) E. Yuriev, D. C. M. Kong and M. N. Iskander, *Eur. J. Med. Chem.*, 2004, **39**, 835.

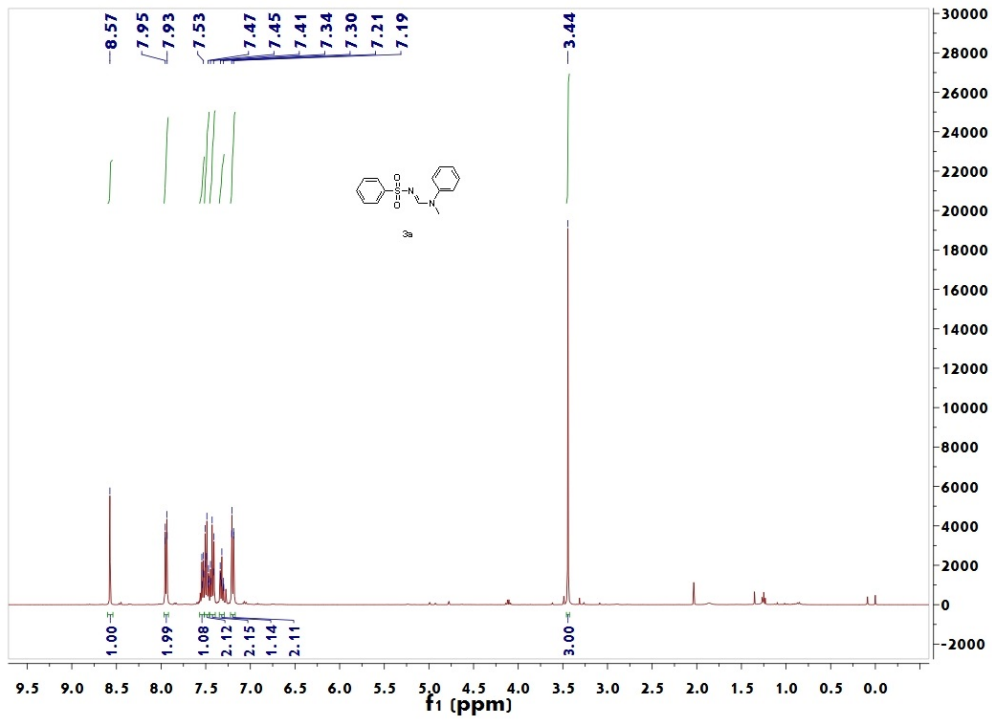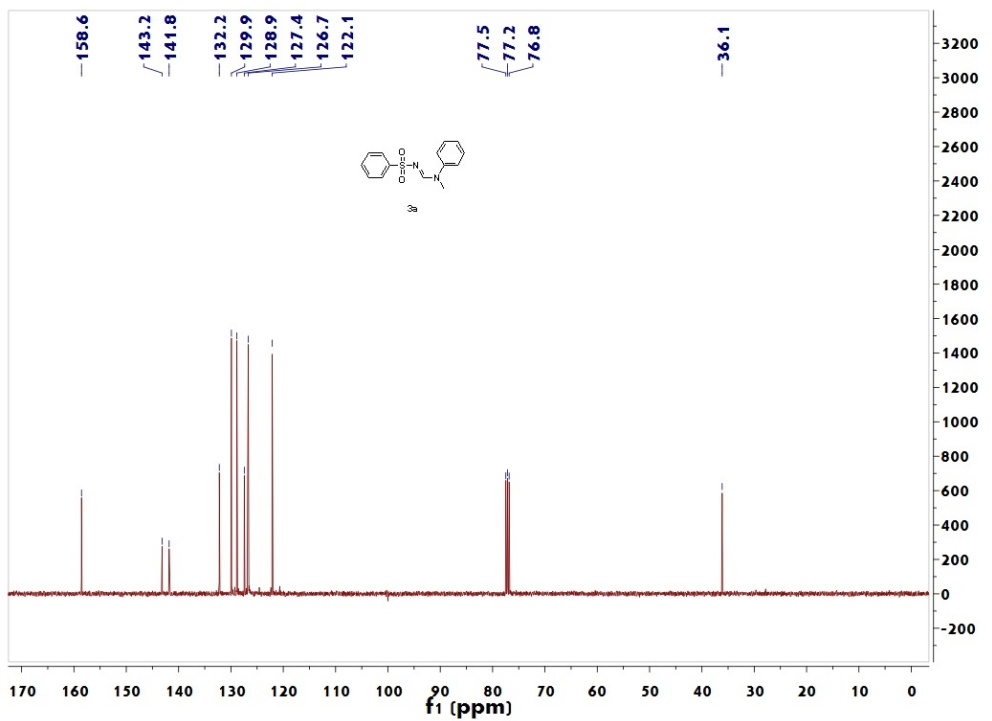



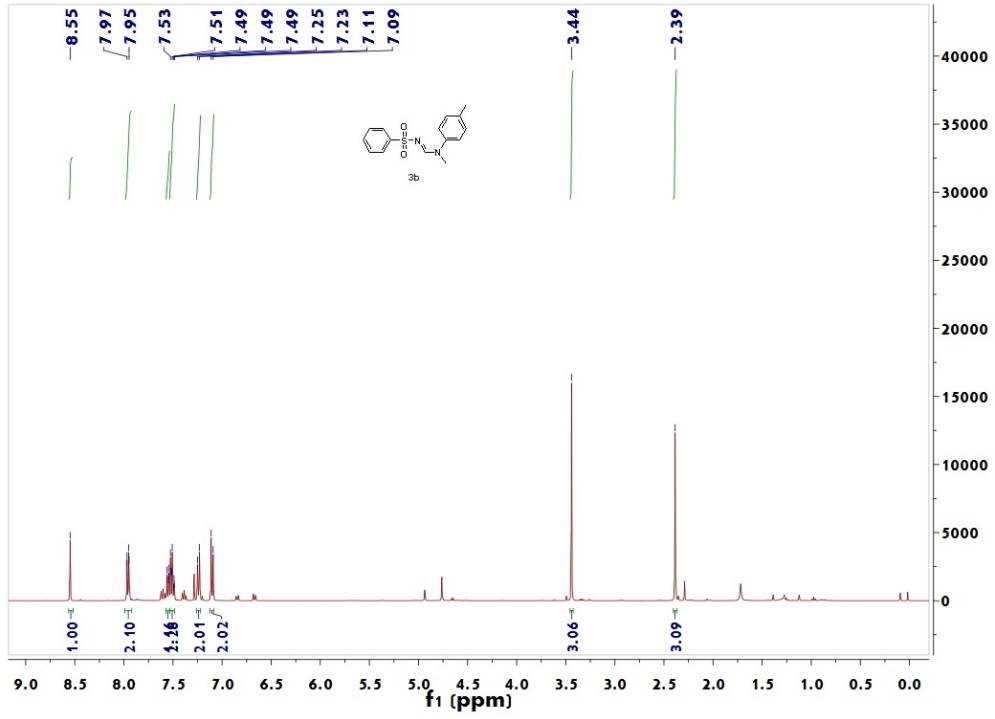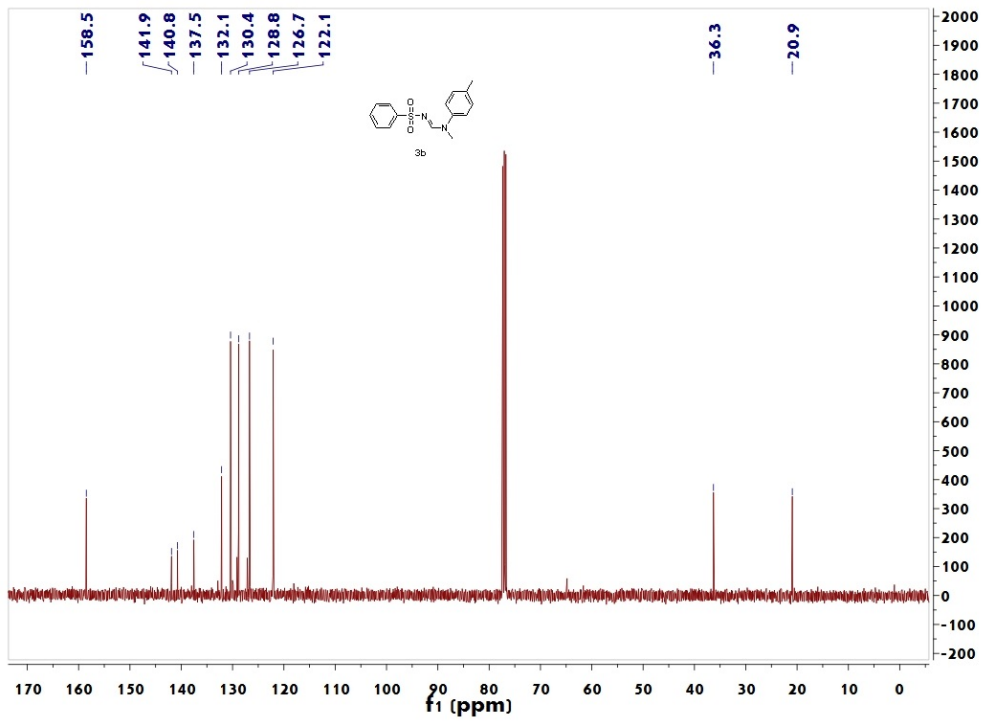

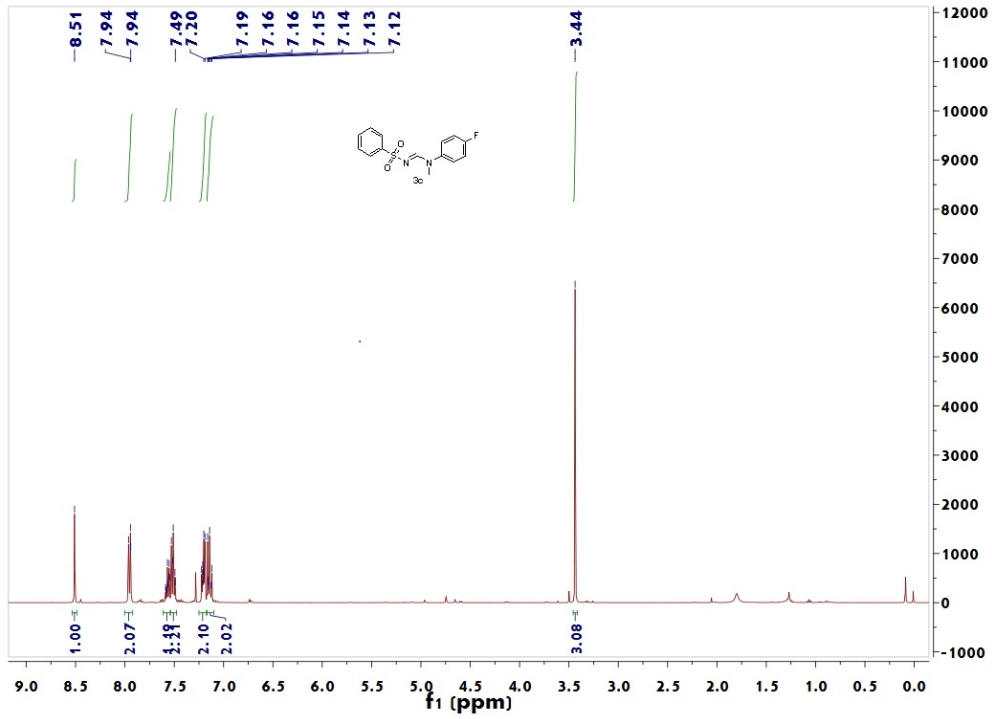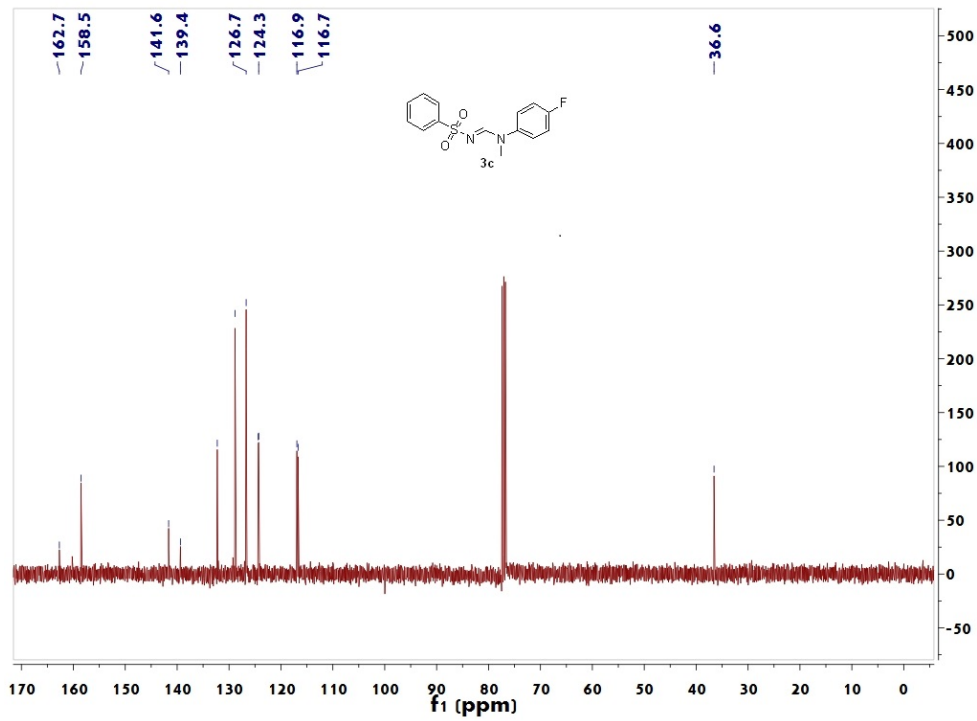

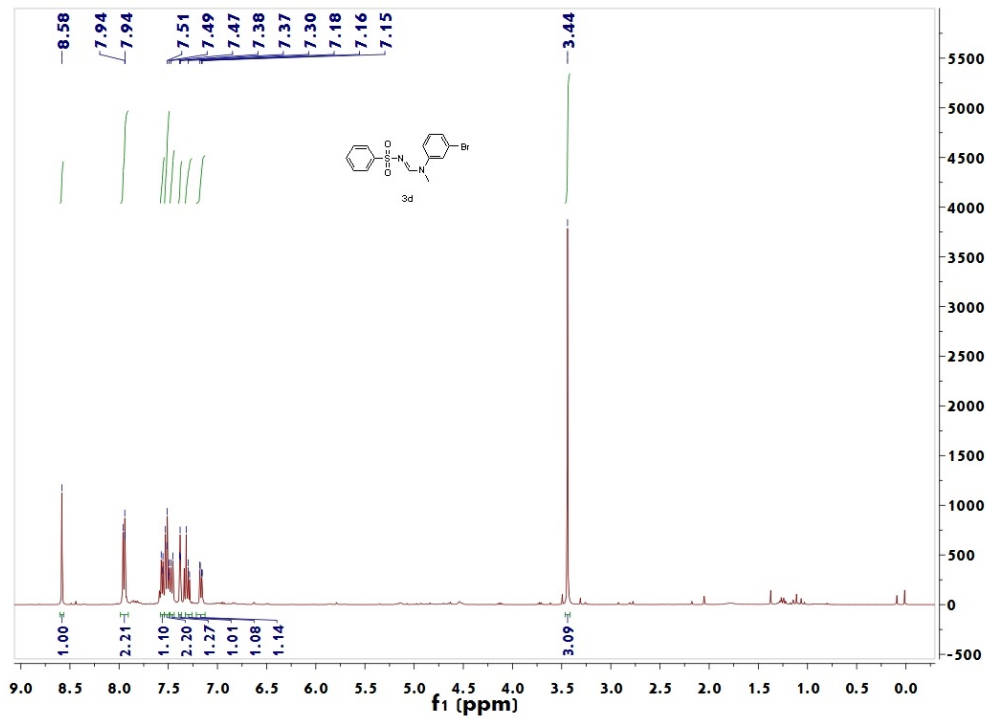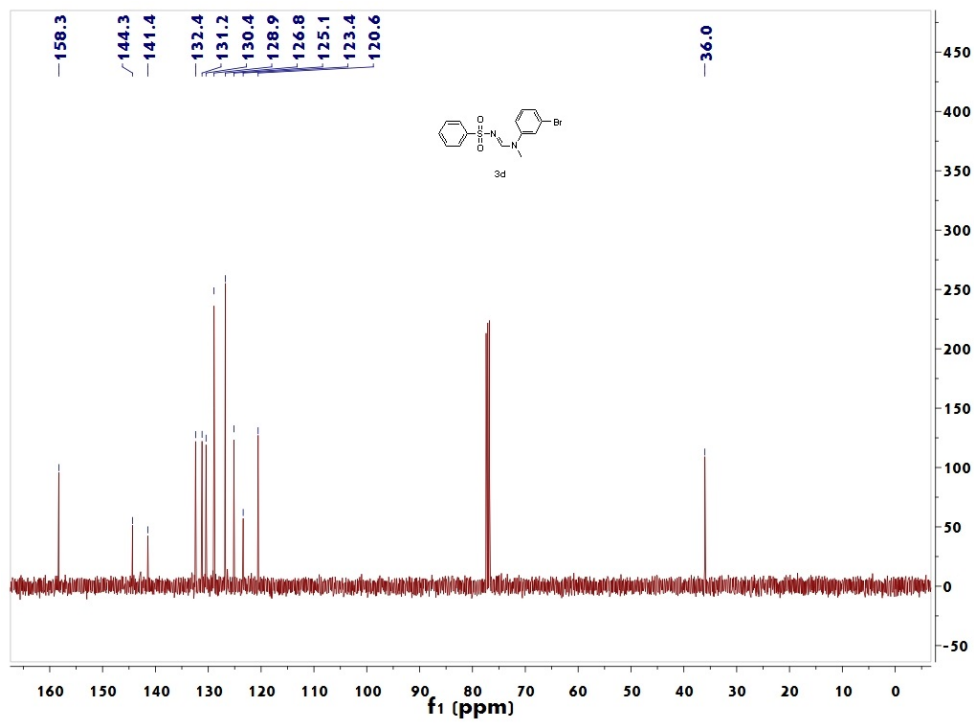

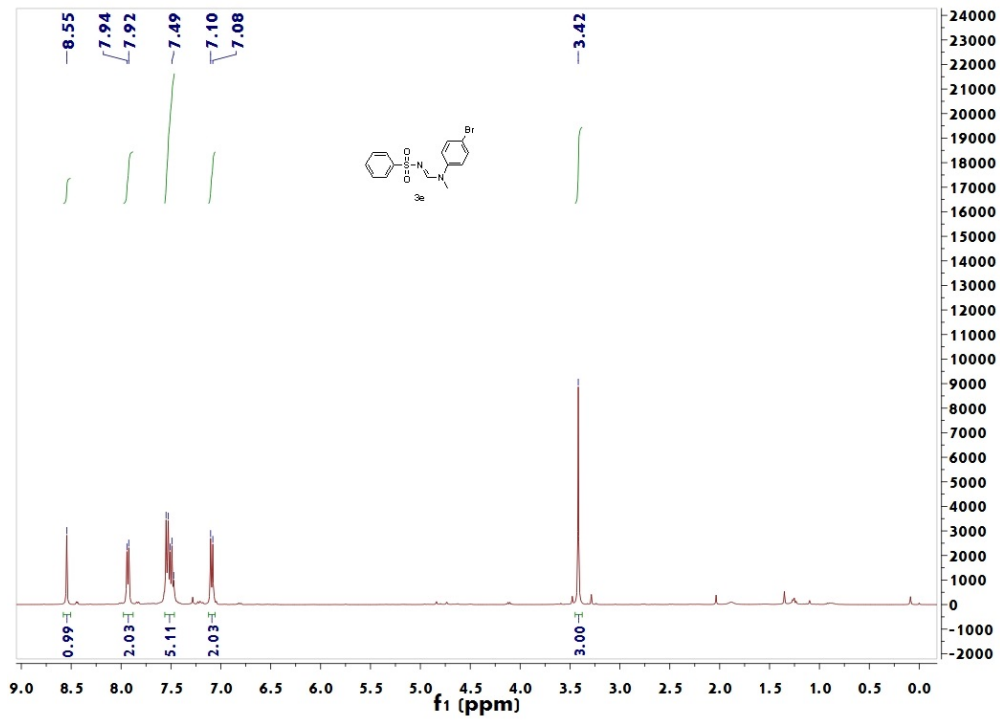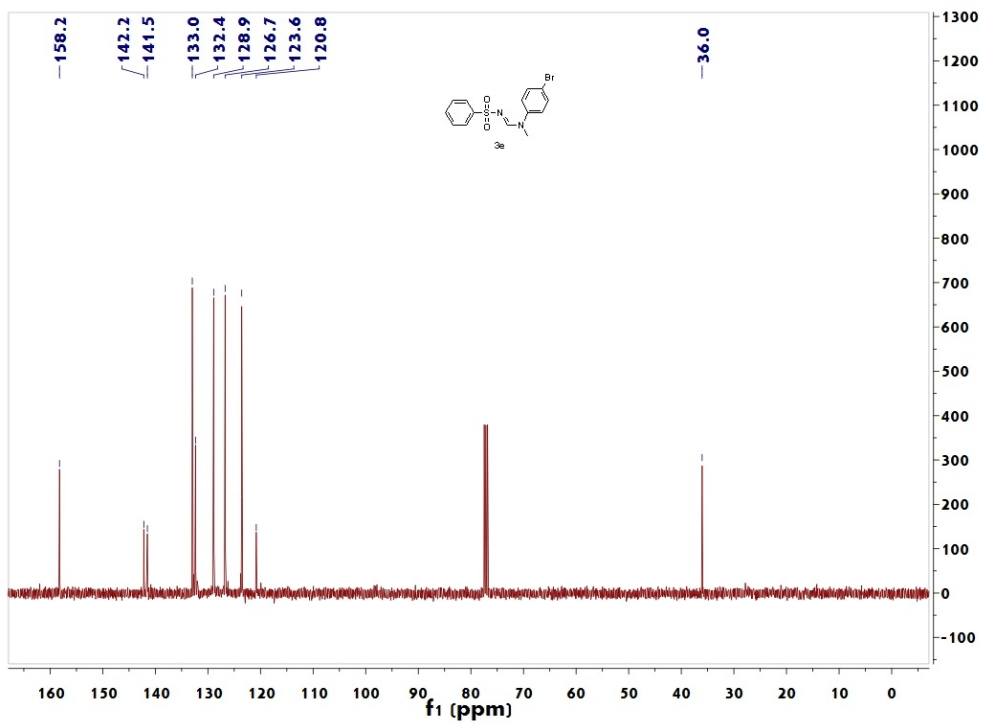

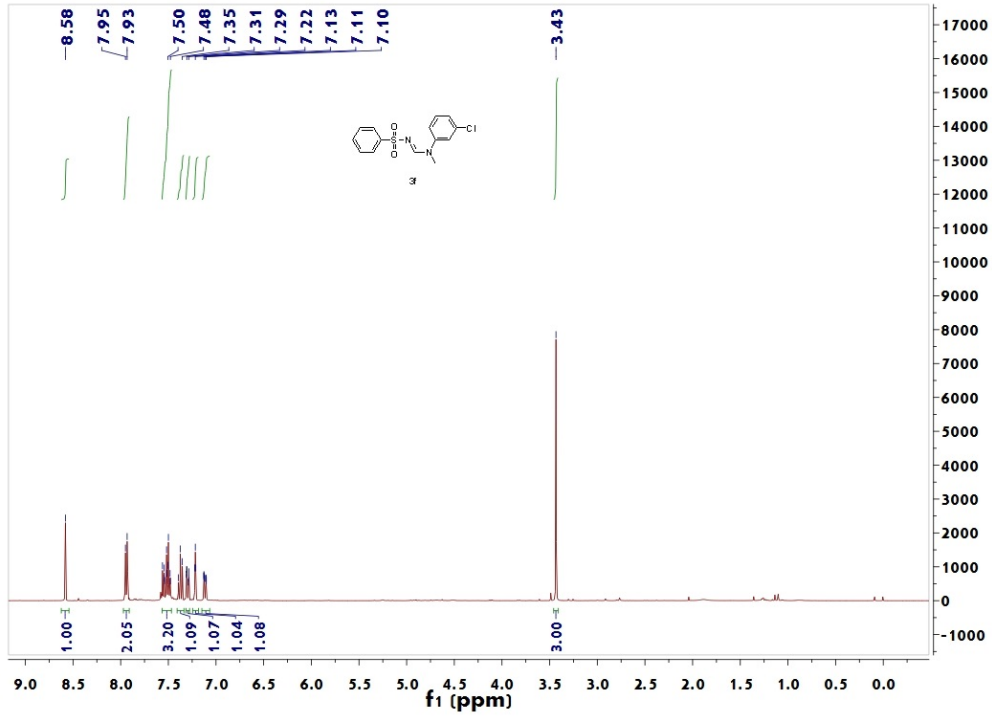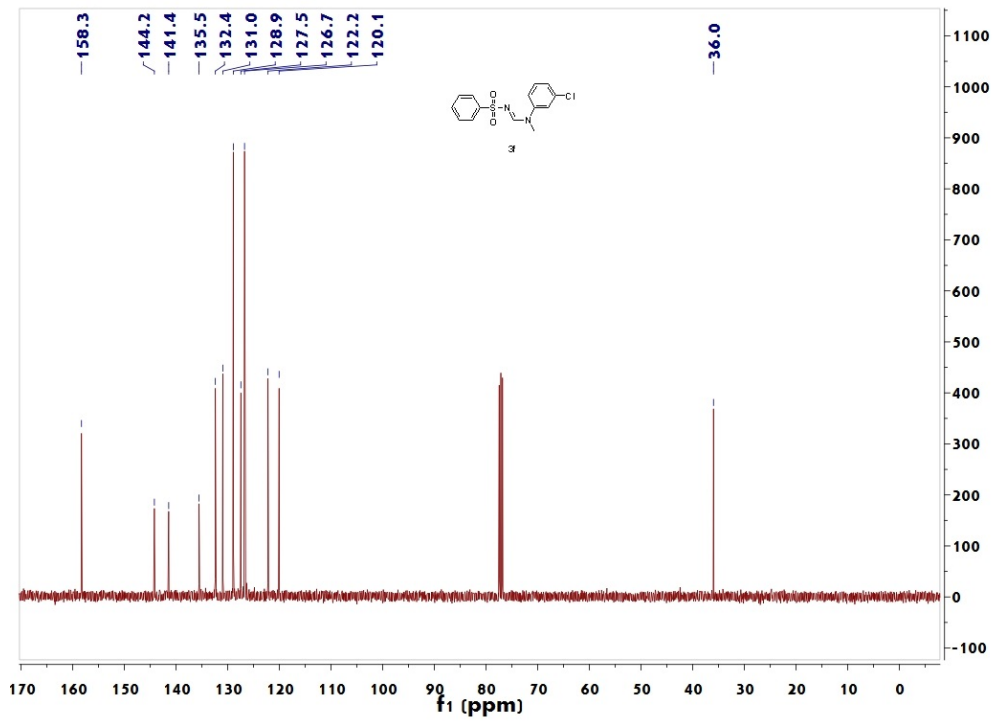

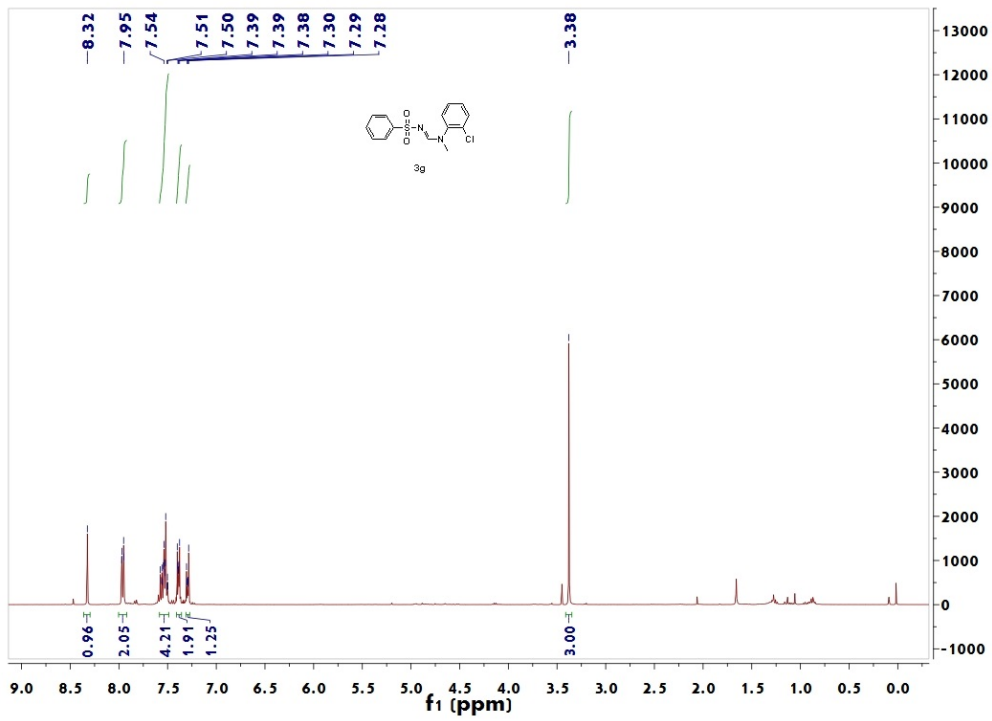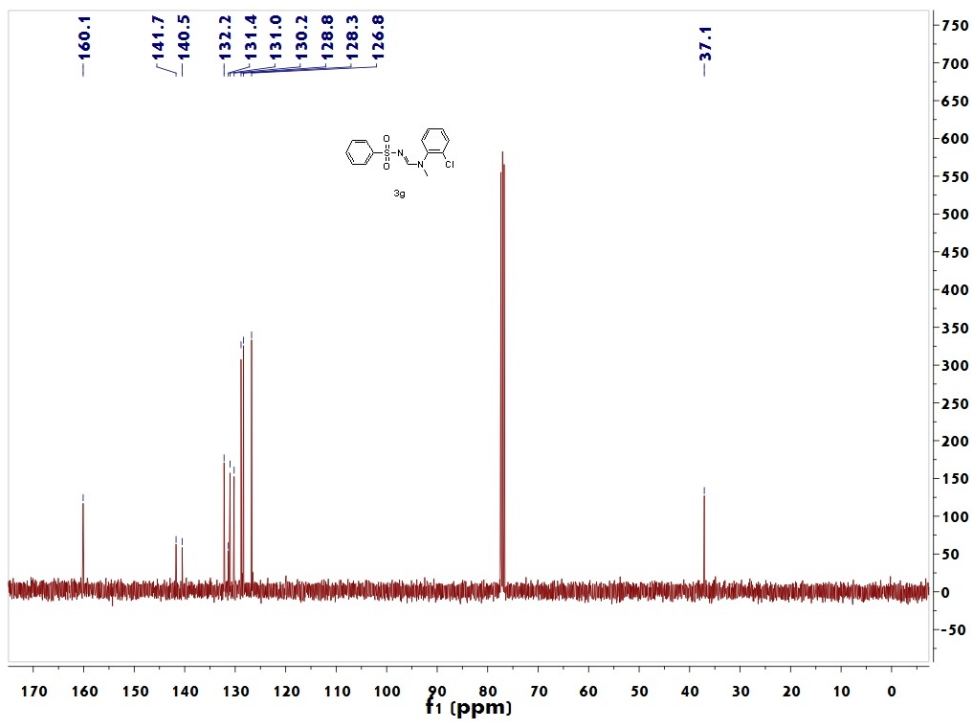

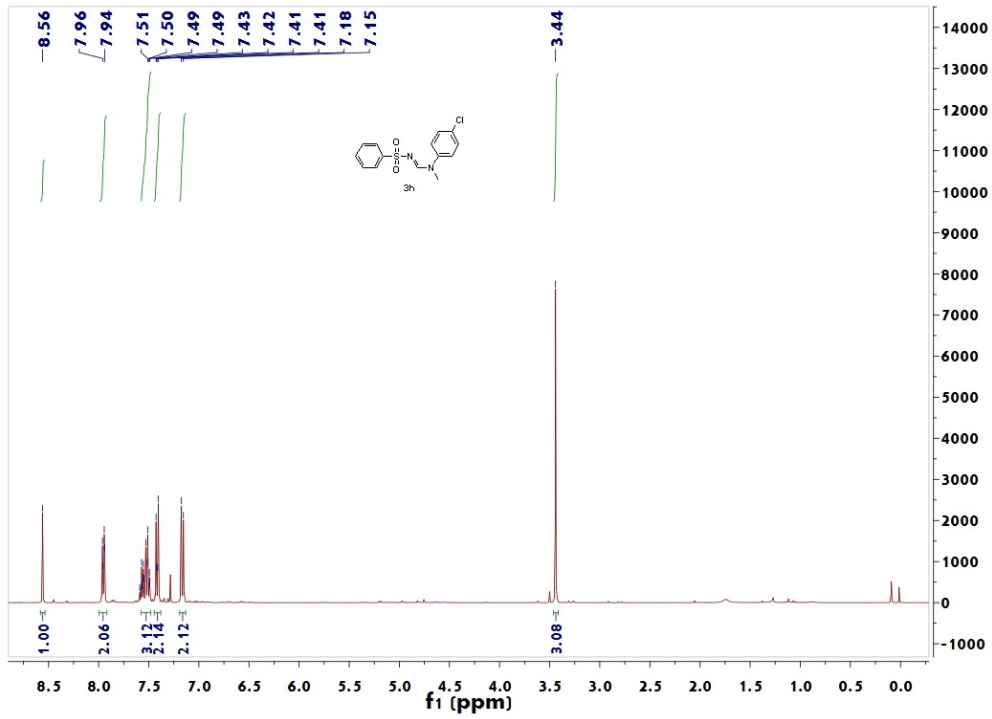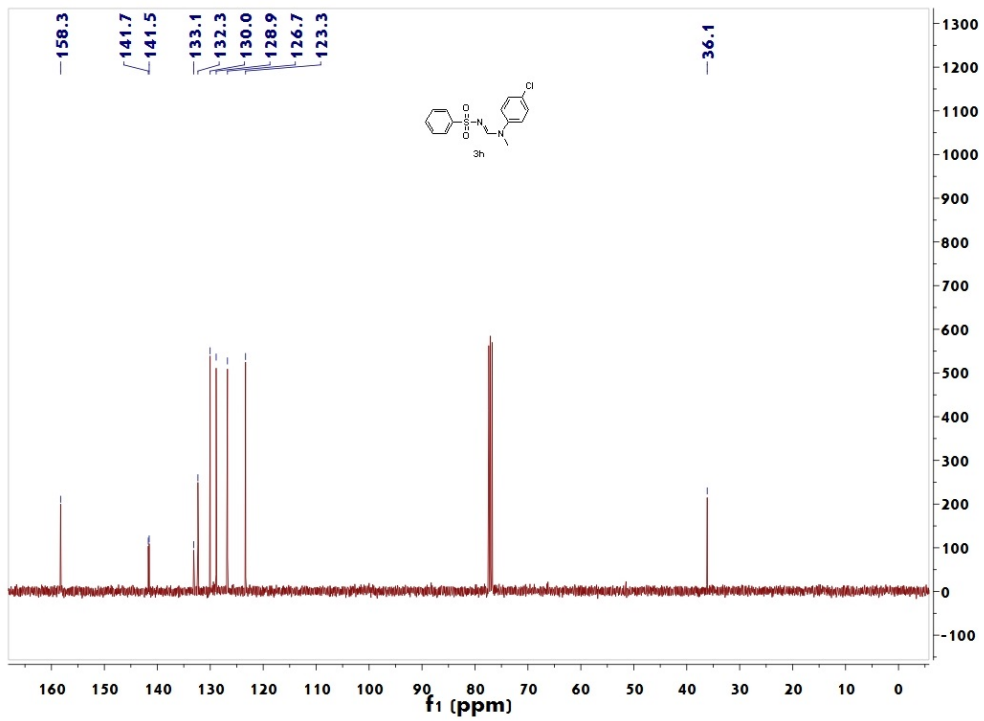

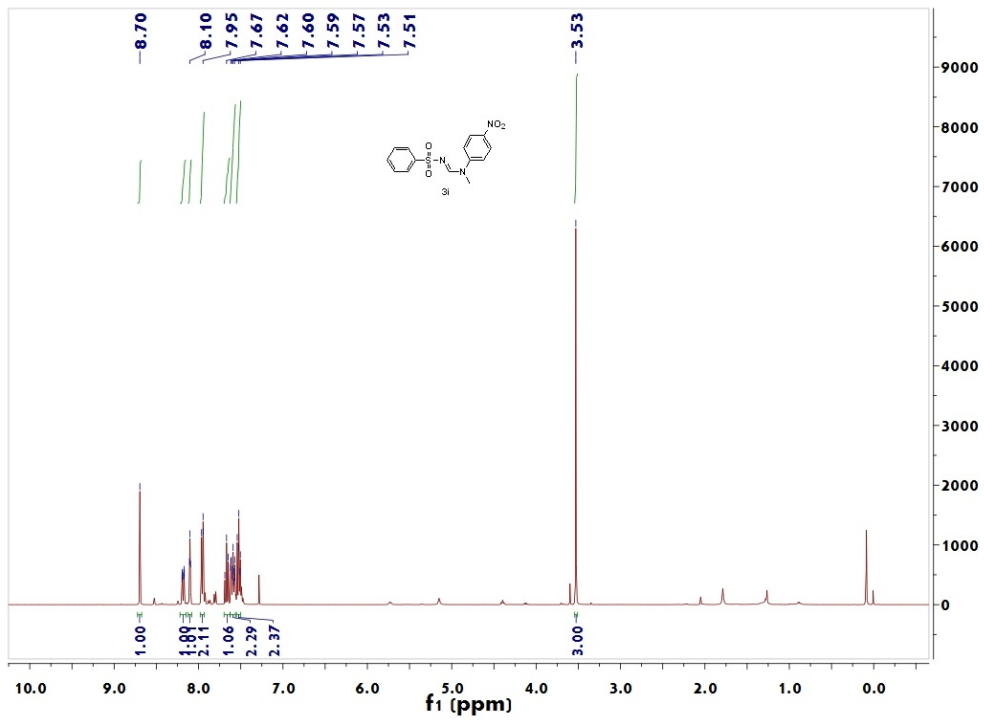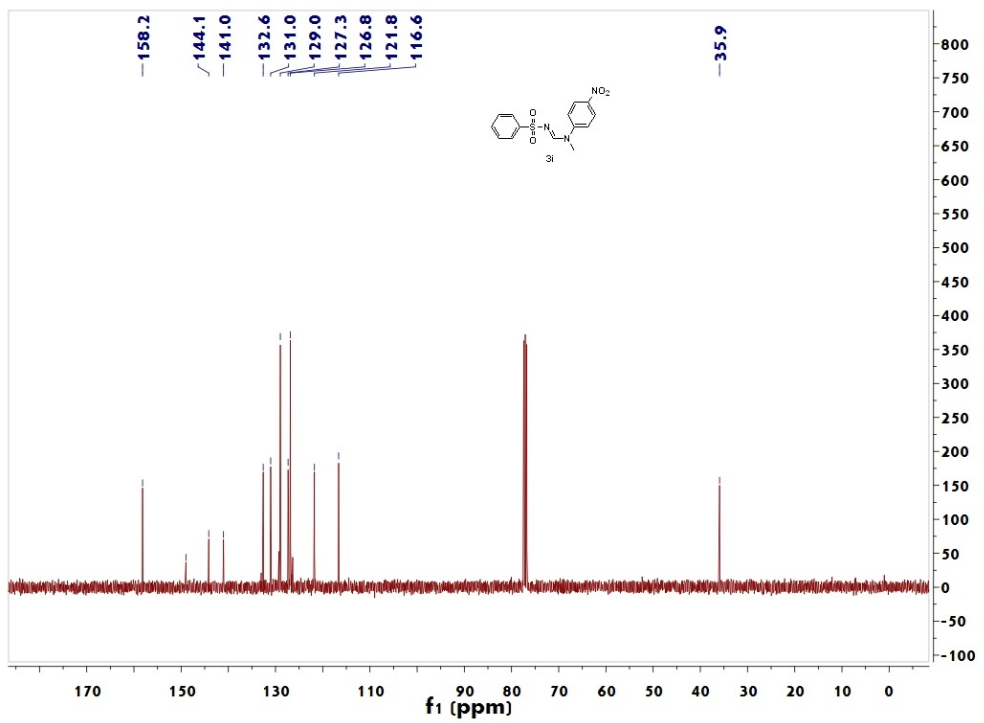



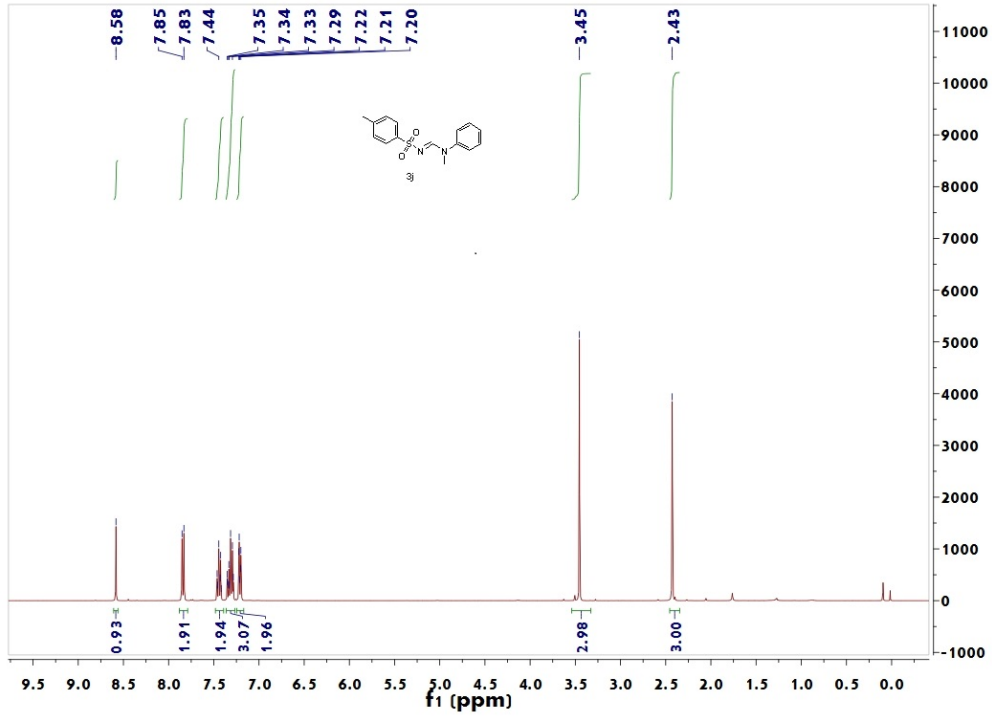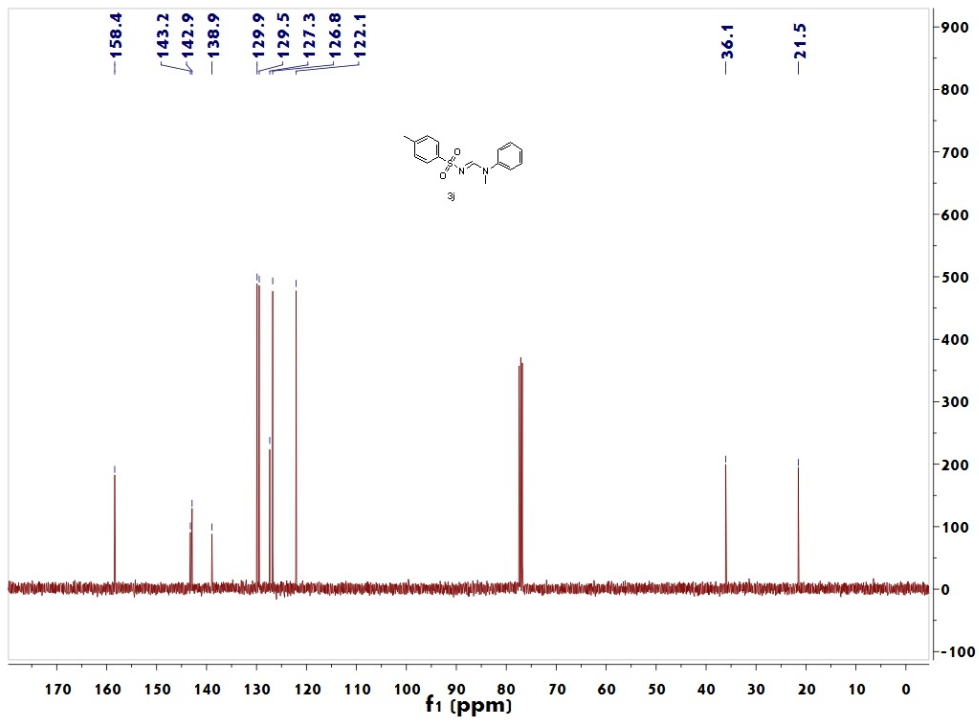

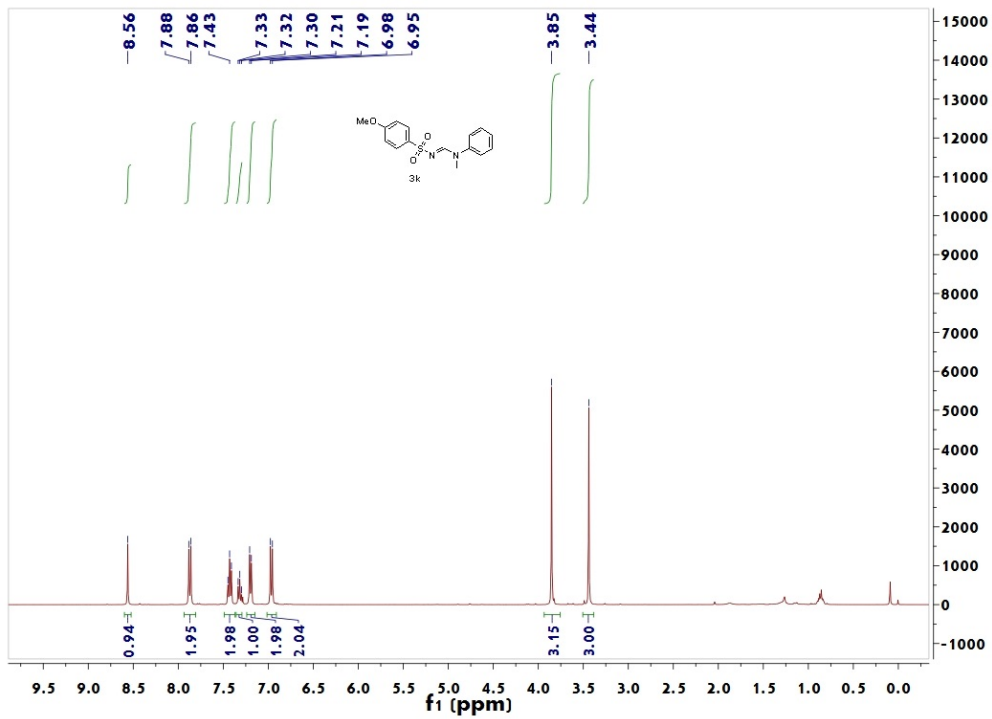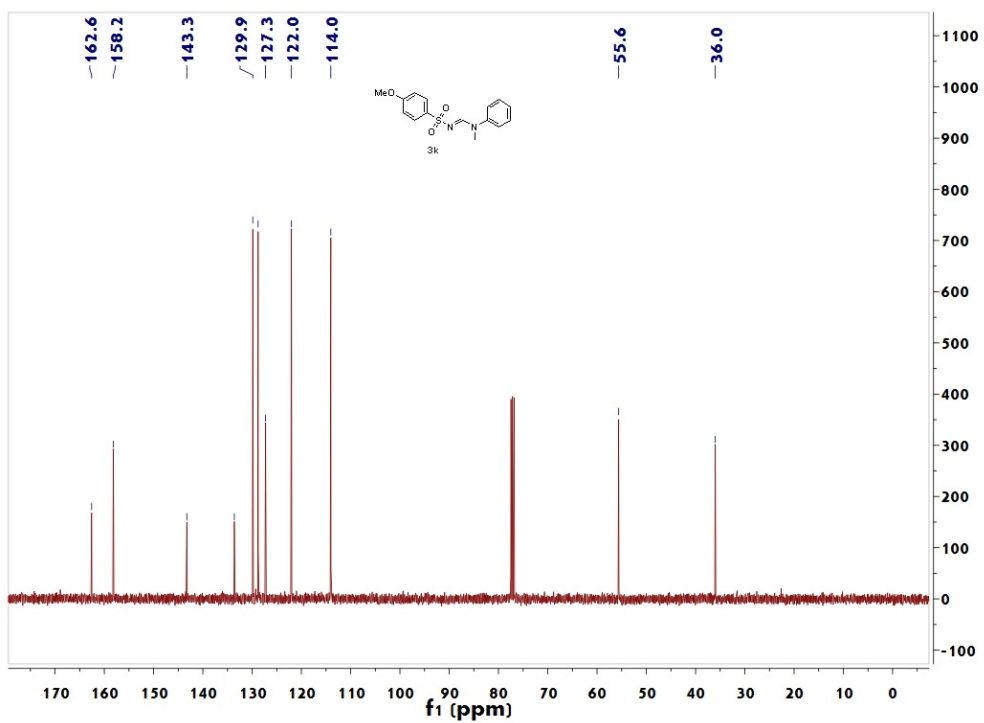

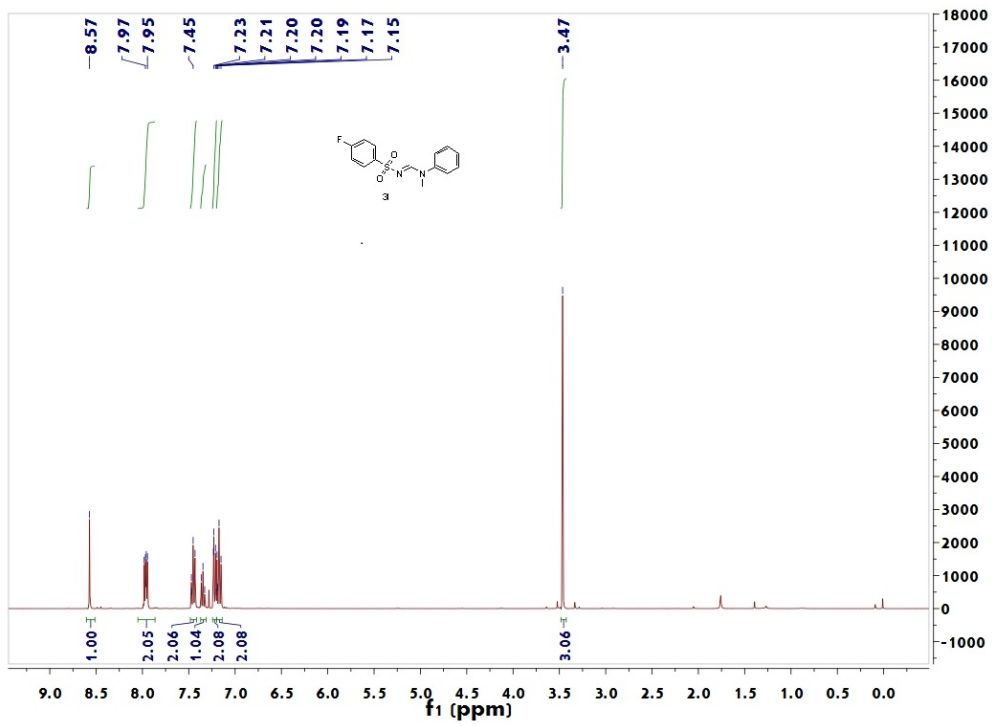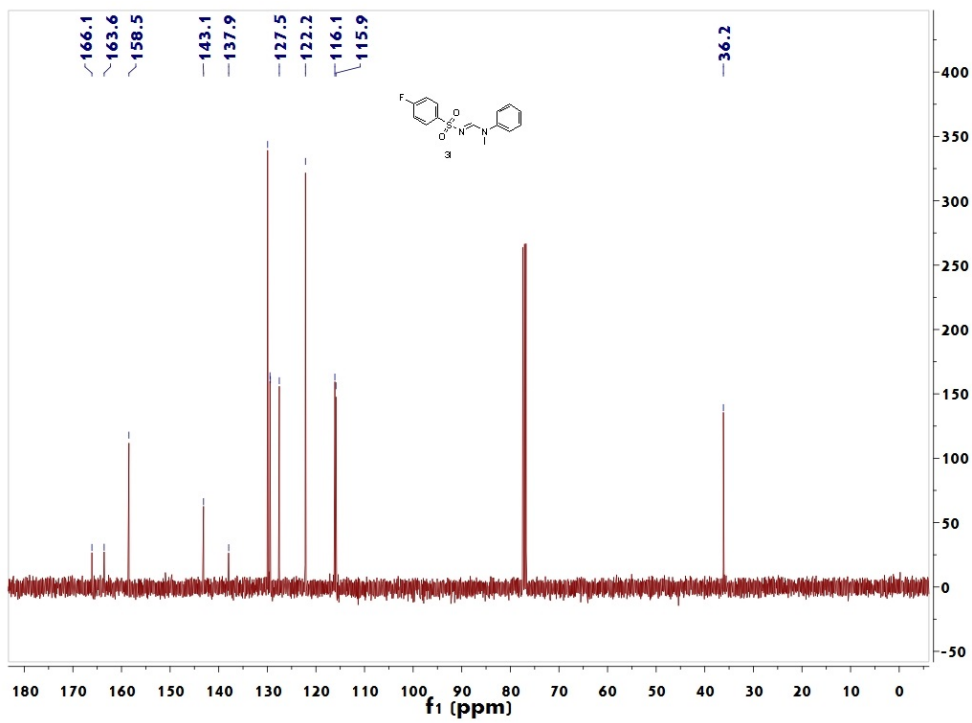

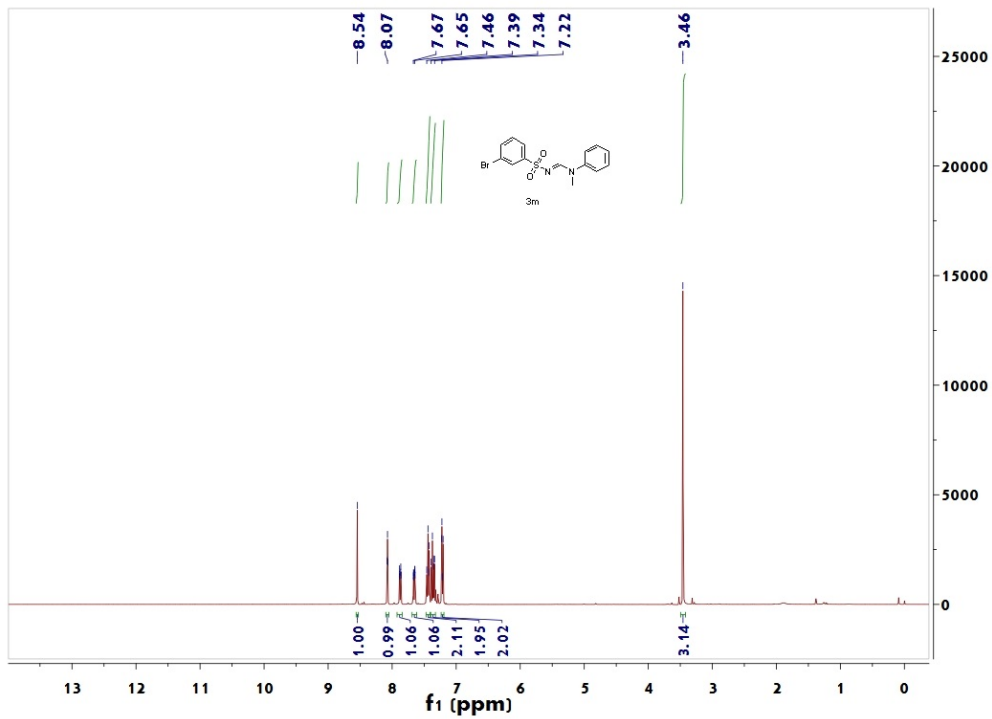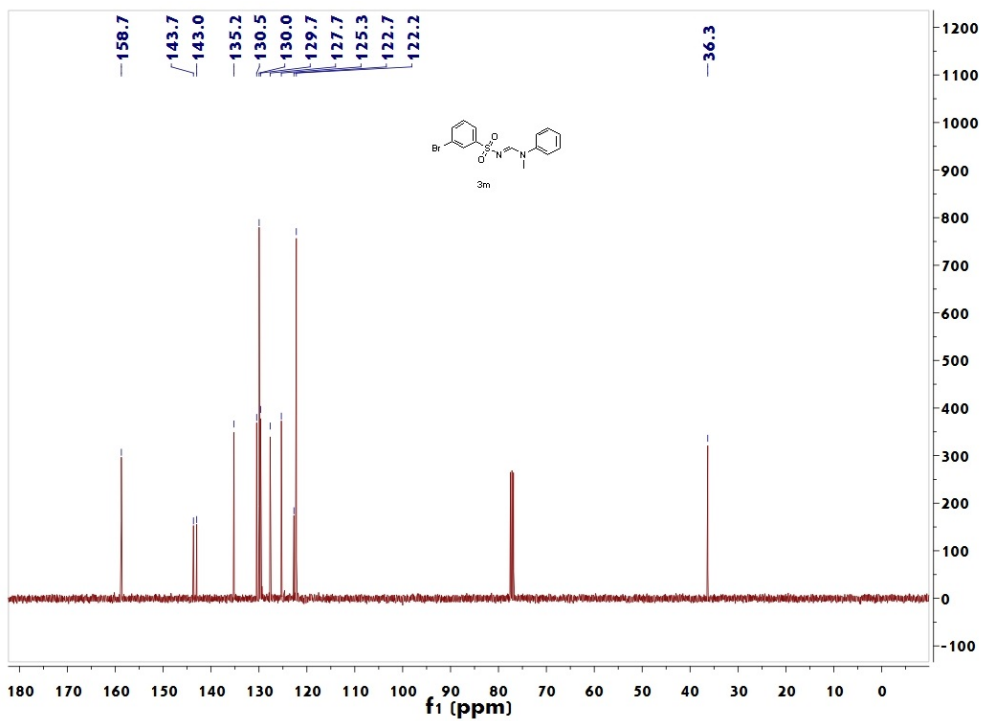

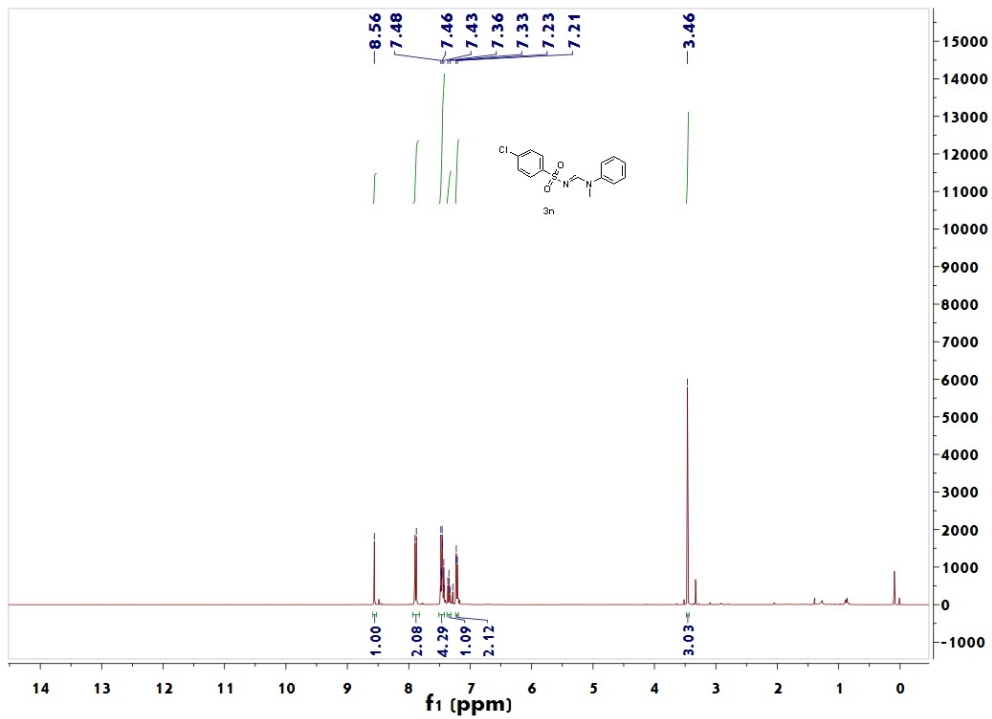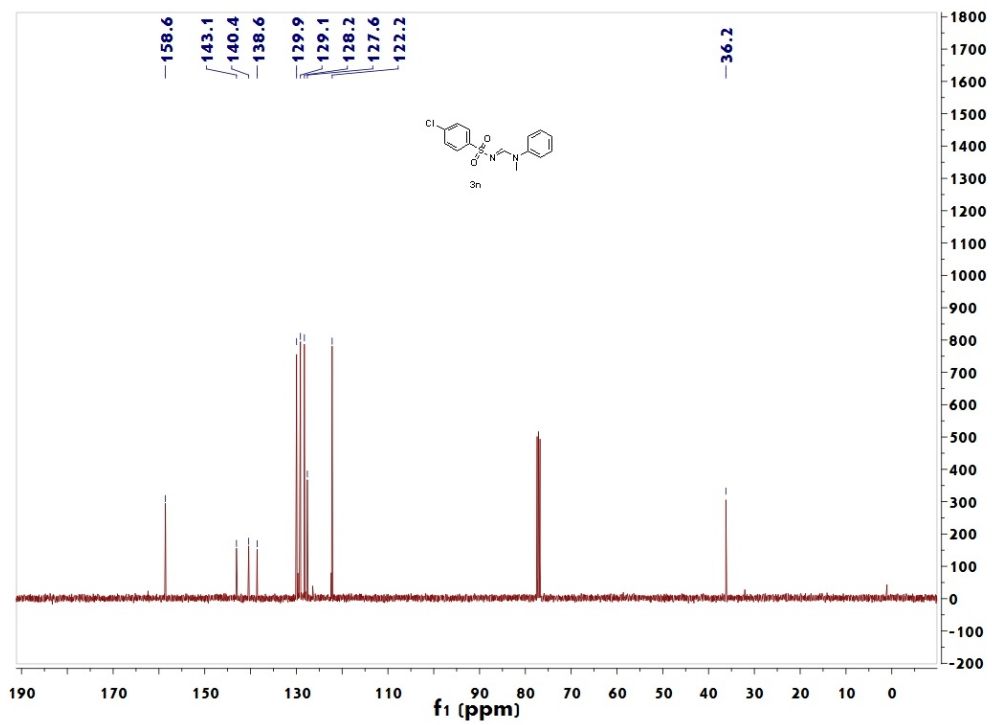

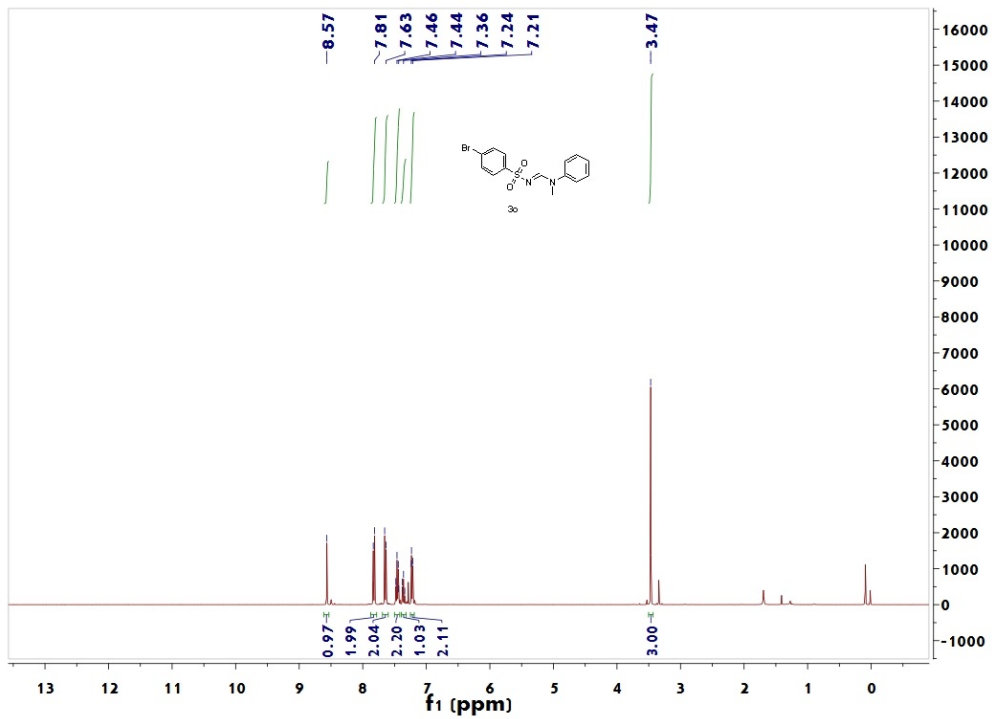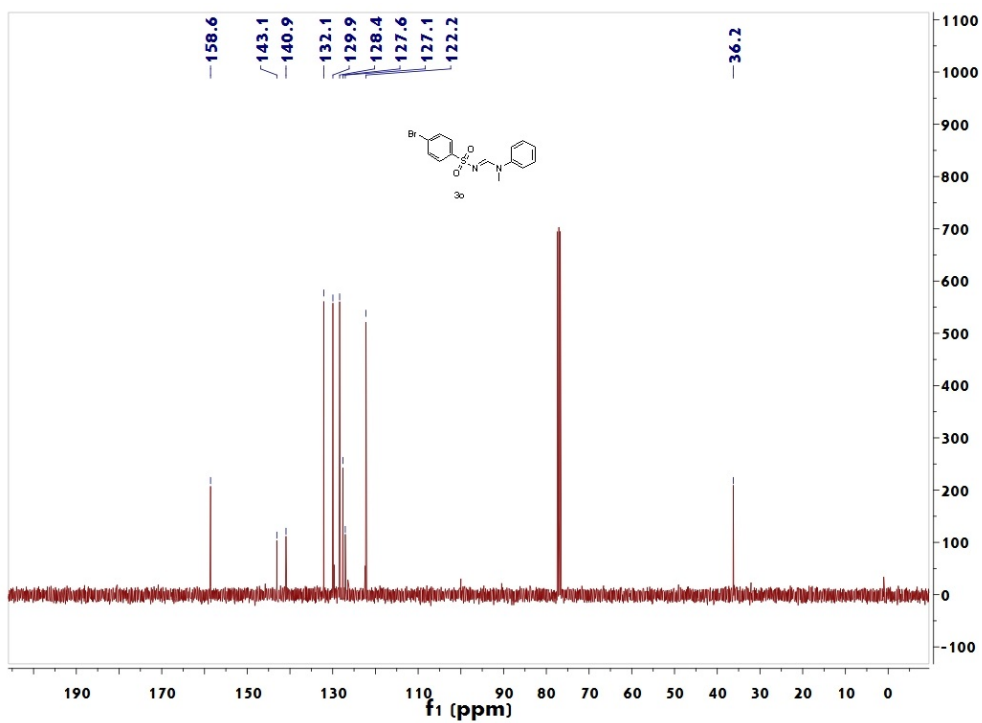

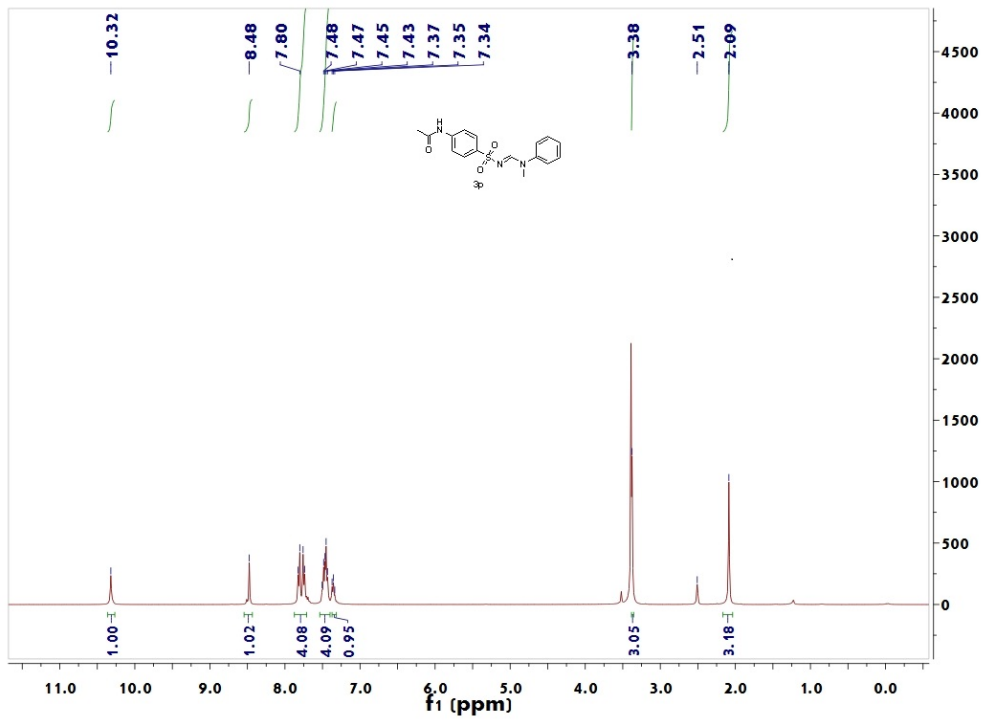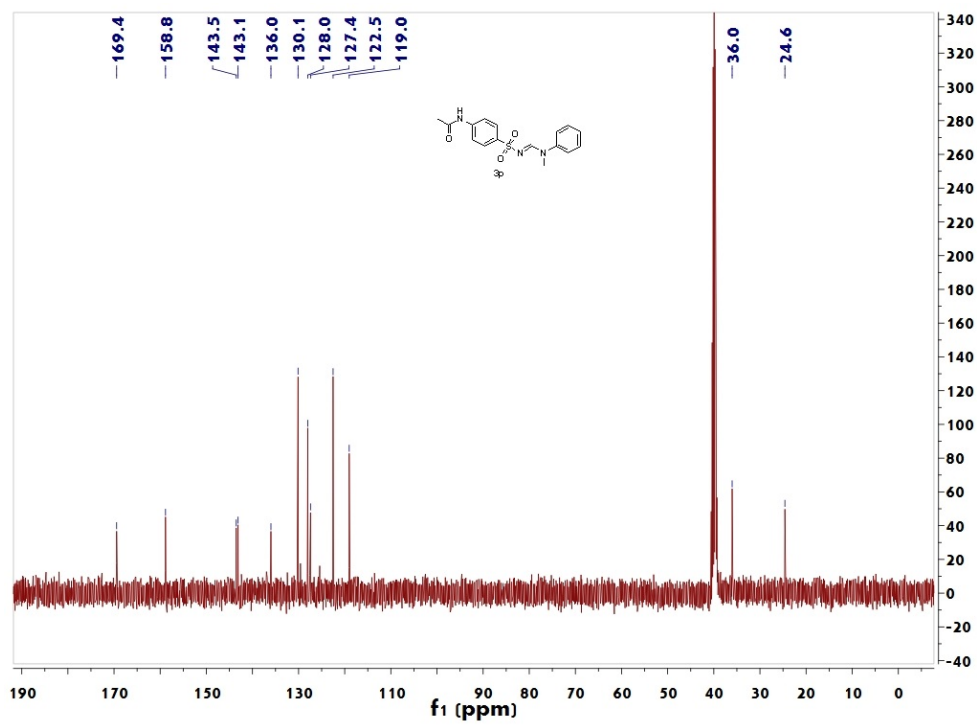

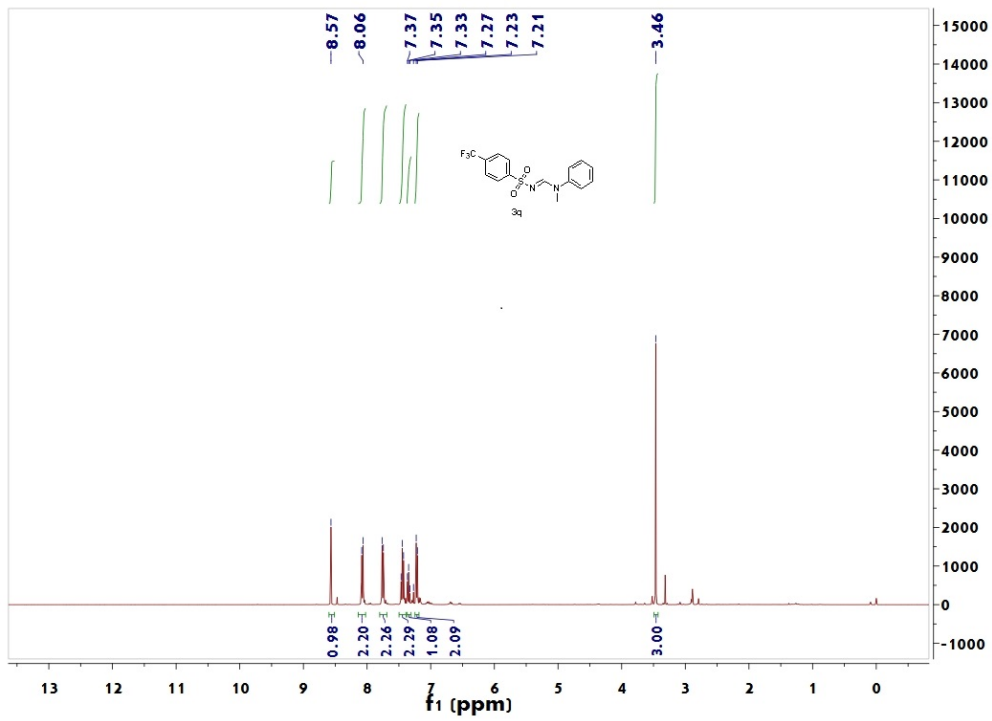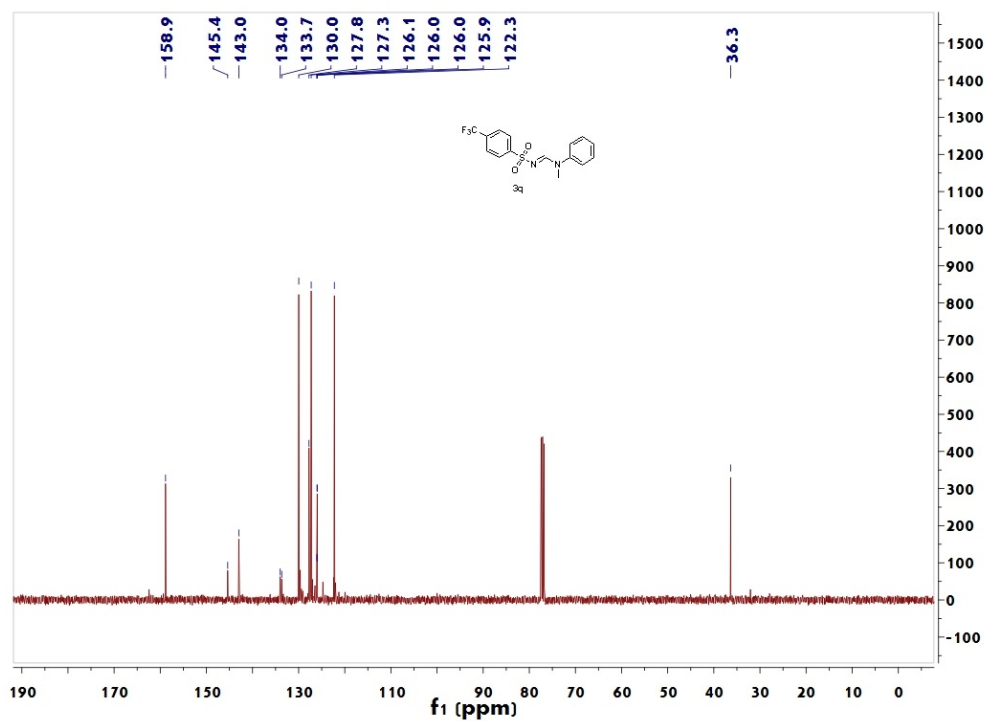



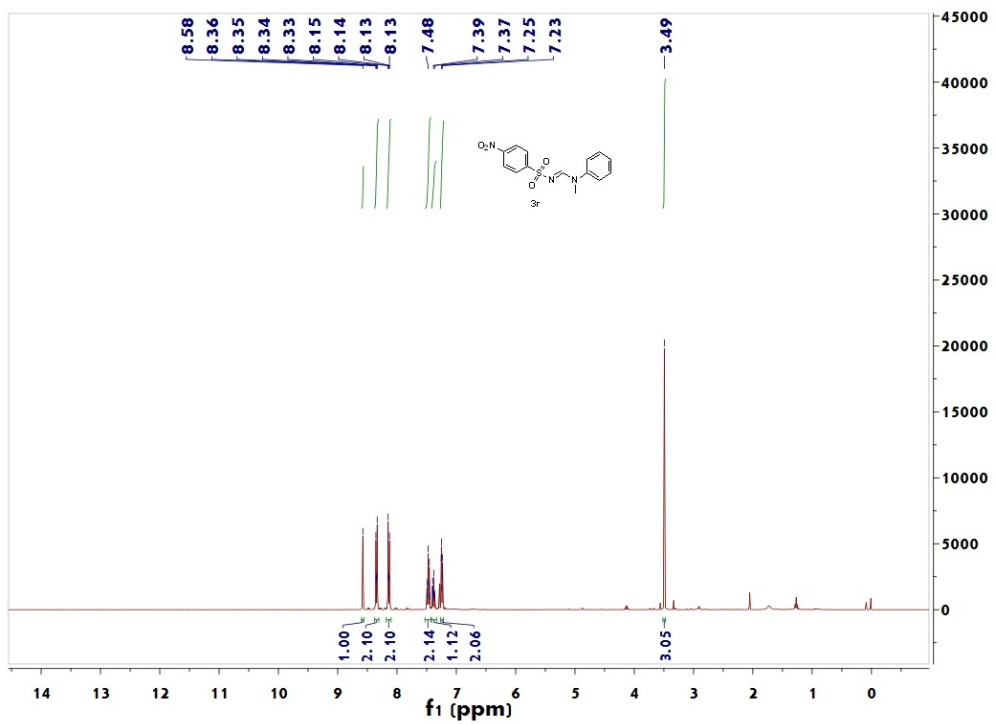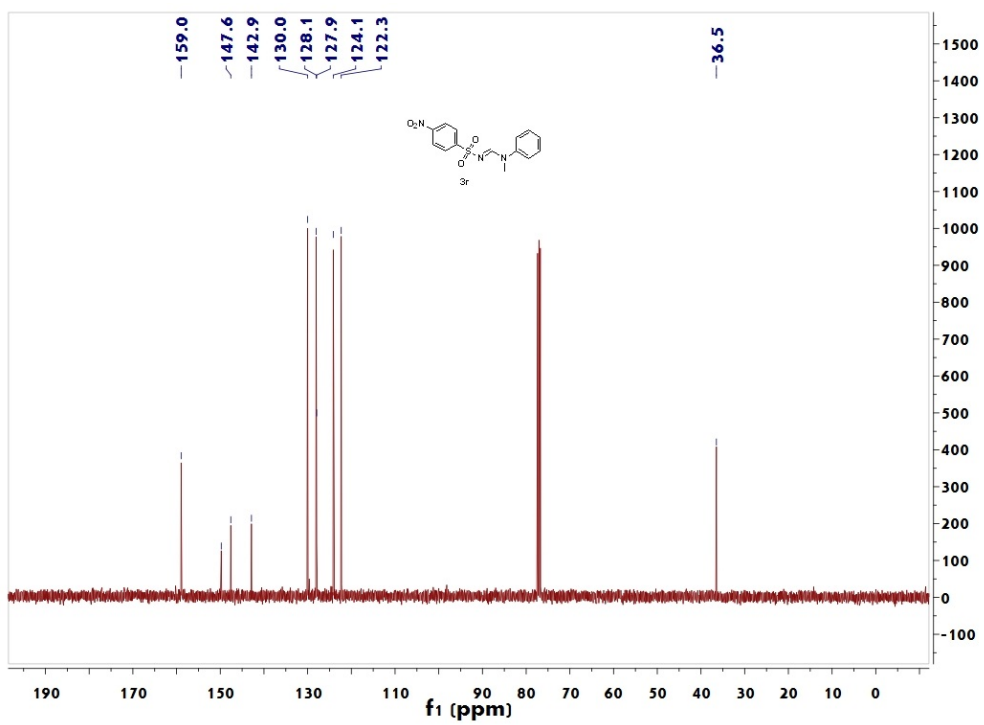

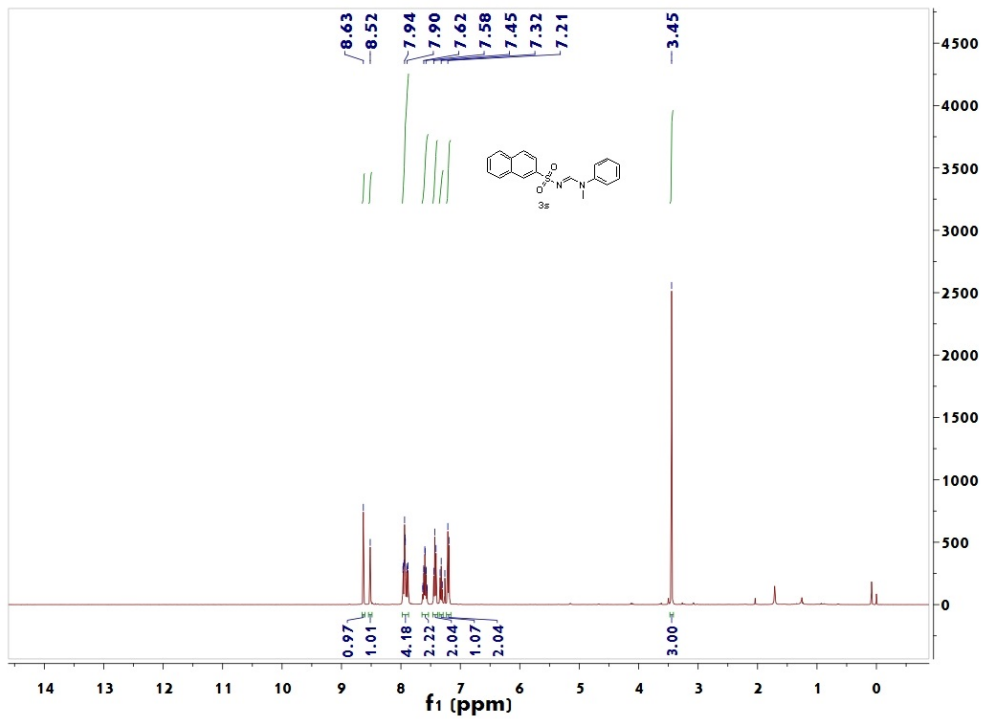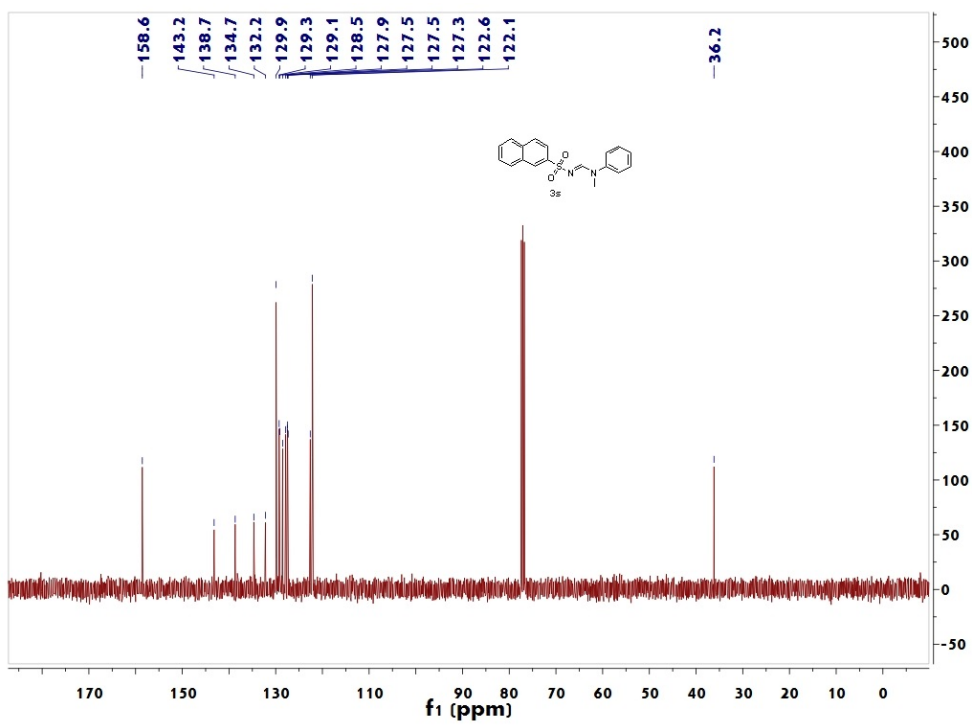

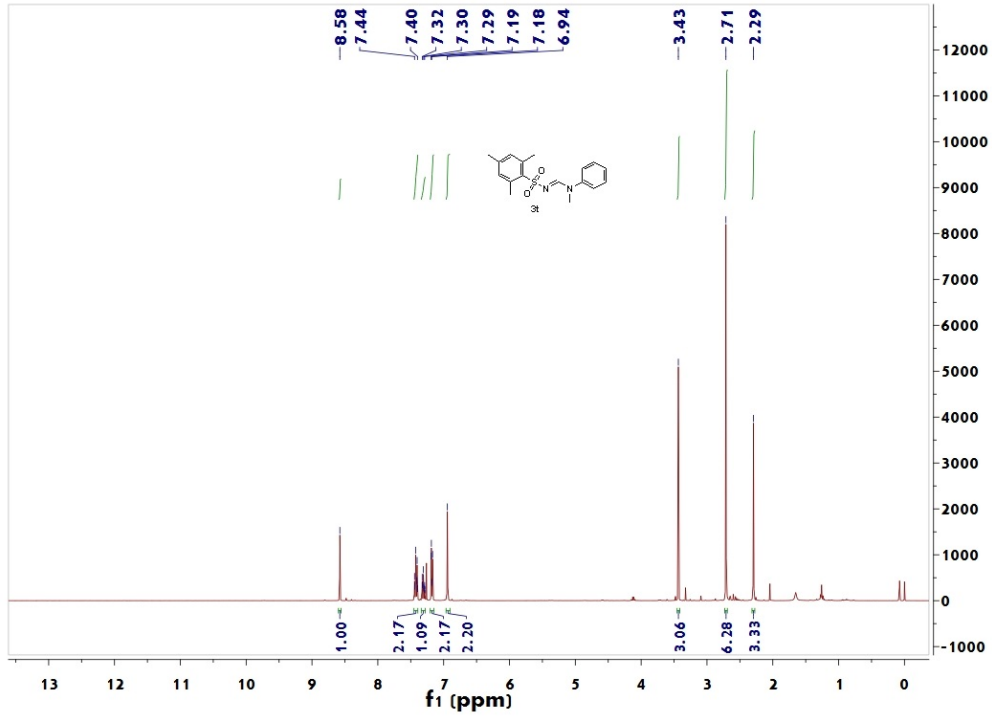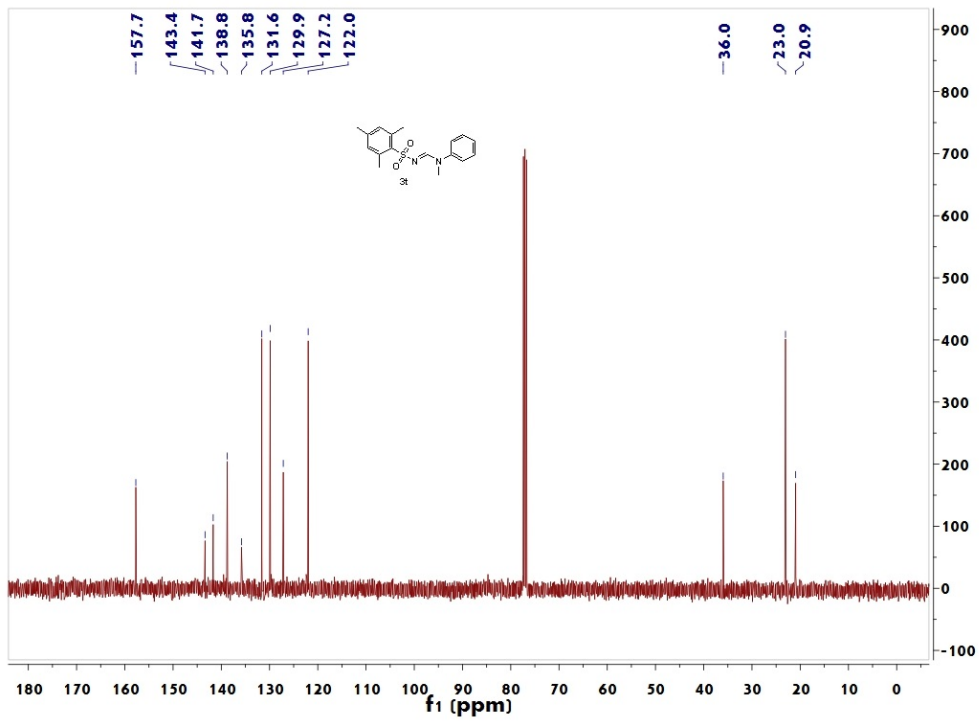

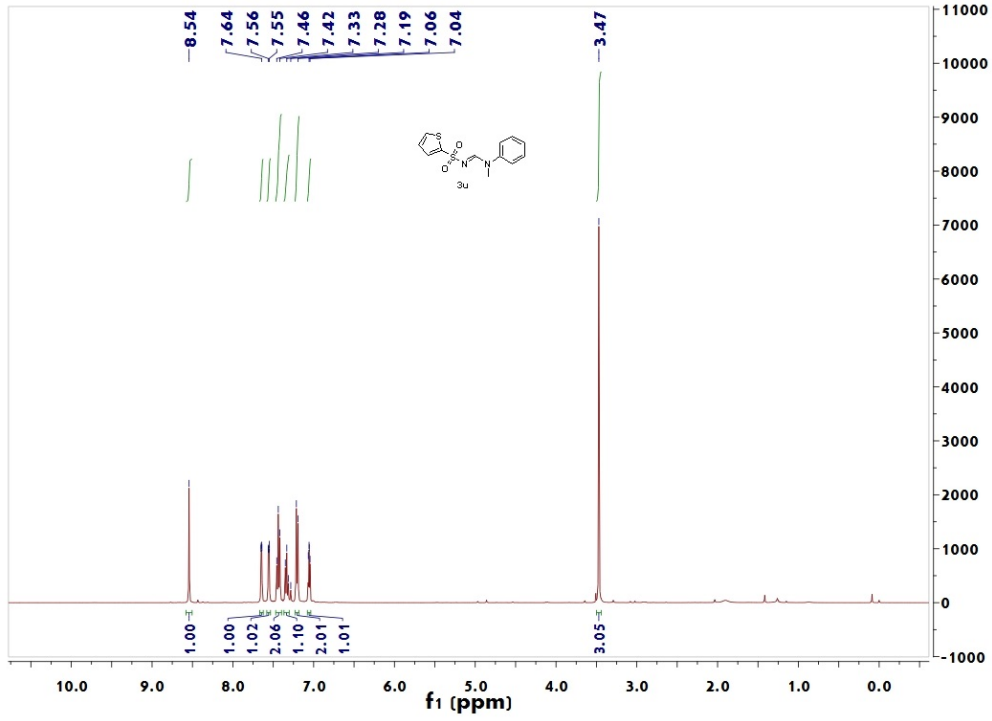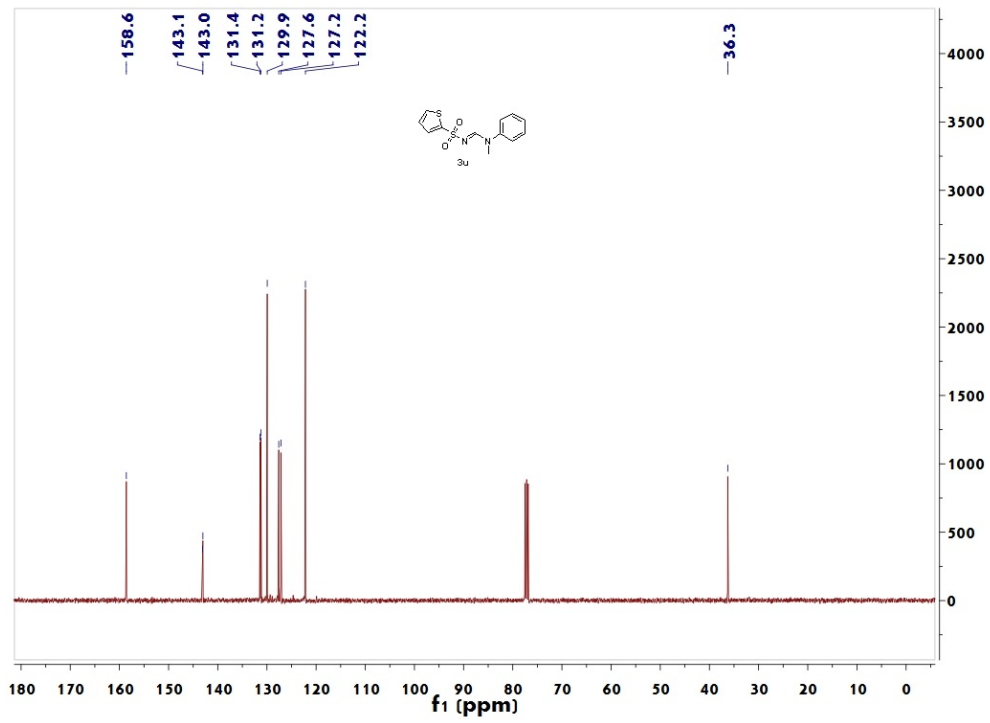

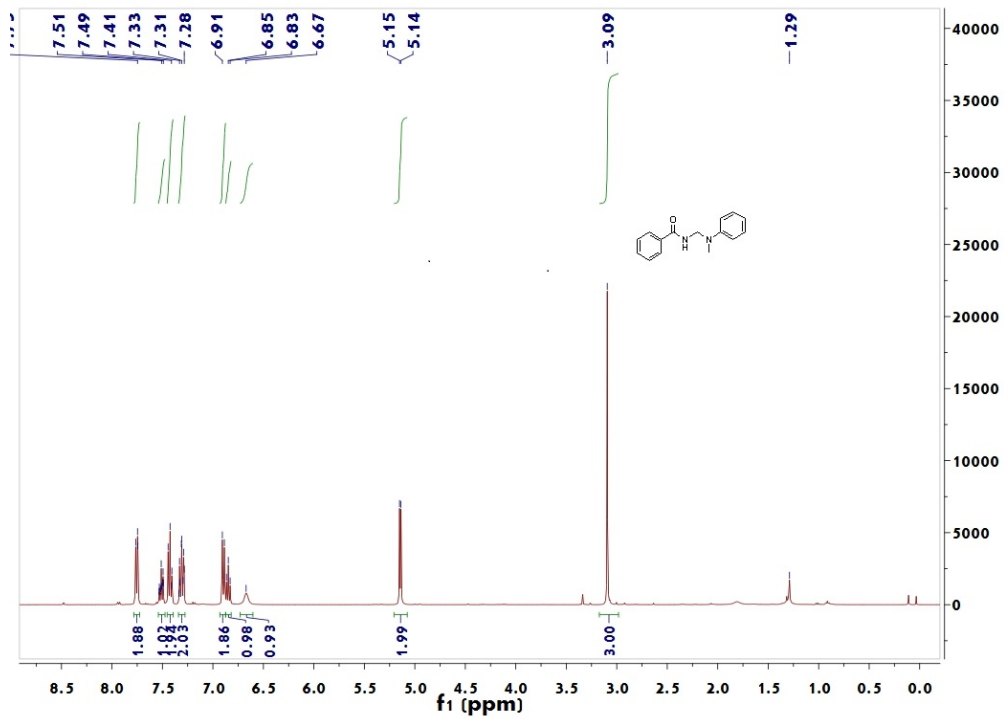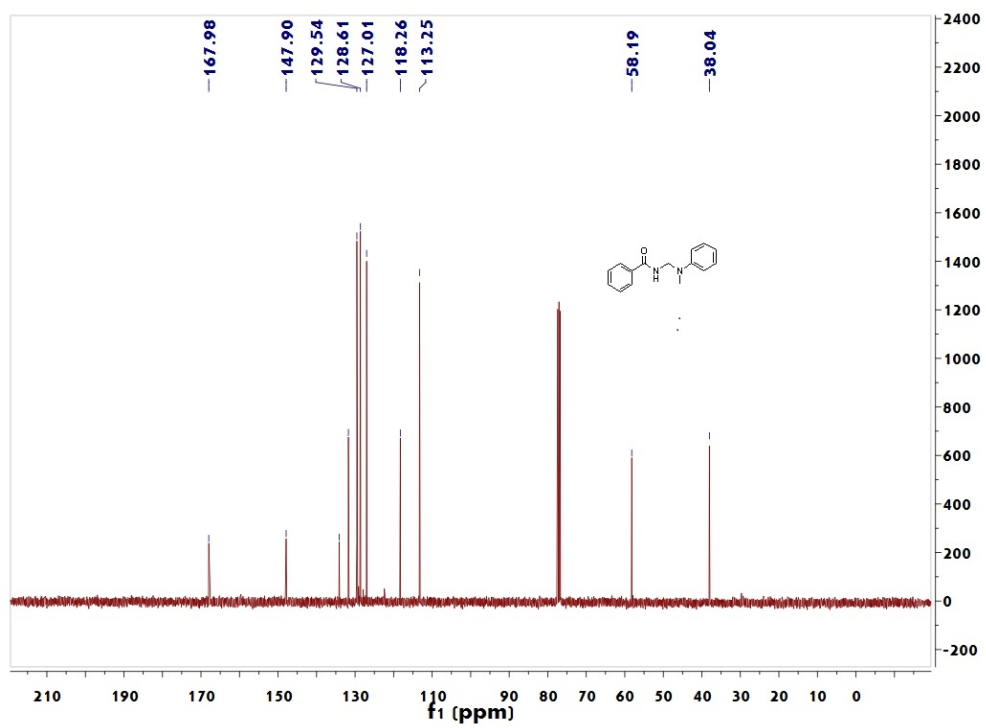

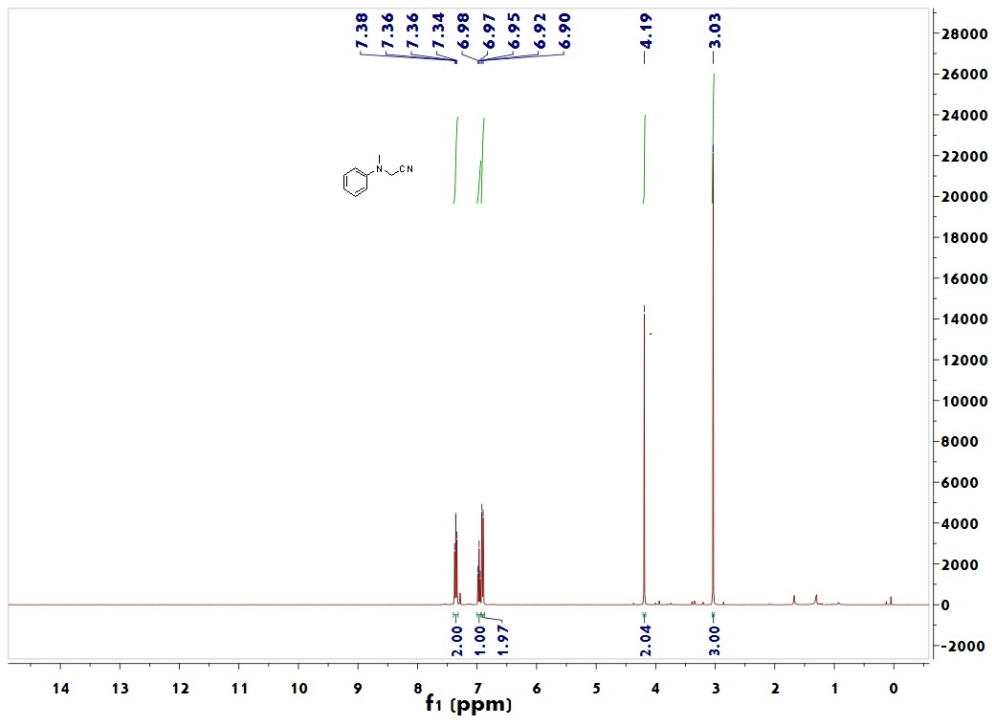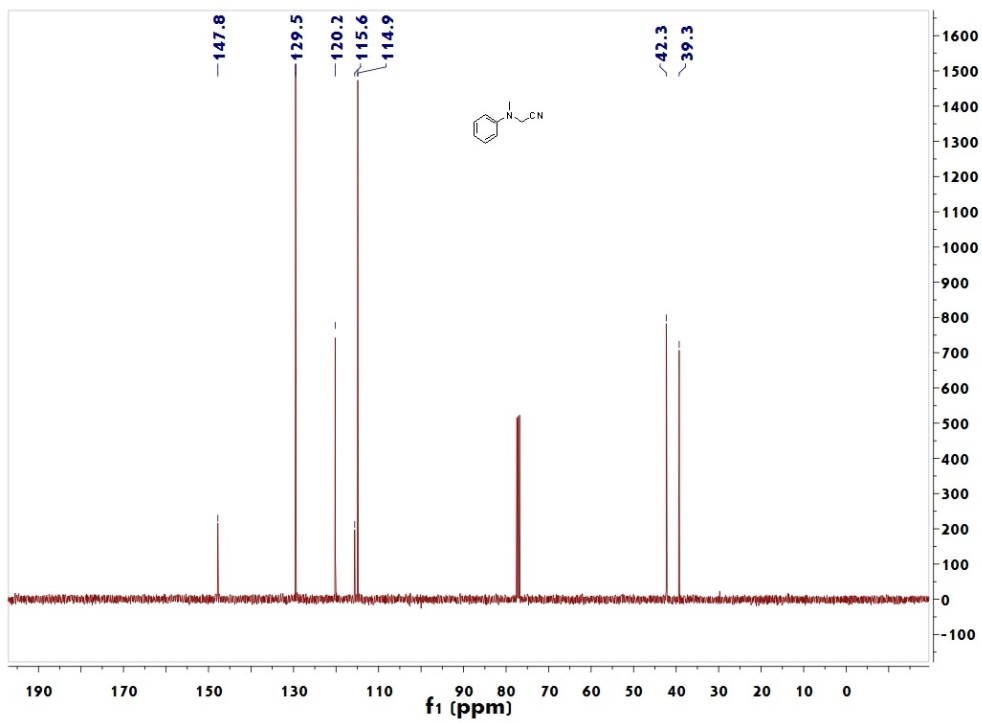

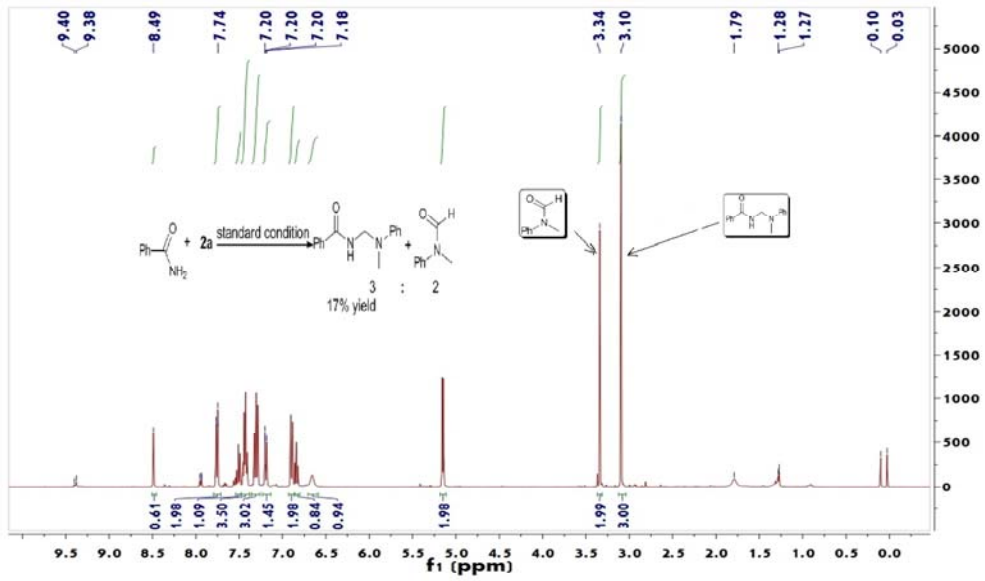

Supplement: c5ra06773a1.pdf [file c5ra06773a1.pdf]
